# Supplementary material for: Regioselective and stereoselective benzylidene installation and one-pot protection of d-mannose
Source: Royal Society of Chemistry journal article supplement (doi:10.1039/c3ob40079d), 2013-01-01

## ELECTRONIC SUPPLEMENTARY INFORMATION

### **Regioselective and stereoselective benzylidene installation and one-pot protection of D-mannose**

Pratap S. Patil,<sup>a</sup> Chia-Chen Lee,<sup>b</sup> Yu-Wen Huang,<sup>b</sup> Medel Manuel L. Zulueta<sup>a</sup>  
and Shang-Cheng Hung<sup>a,c\*</sup>

<sup>a</sup>*Genomics Research Center, Academia Sinica, 128, Section 2, Academia Road, Taipei 115, Taiwan;* <sup>b</sup>*Department of Chemistry, National Tsing Hua University, 101, Section 2, Kuang-Fu Road, Hsinchu 300, Taiwan;* <sup>c</sup>*Department of Applied Chemistry, National Chiao Tung University, 1001, Ta-Hsueh Road, Hsinchu 300, Taiwan*

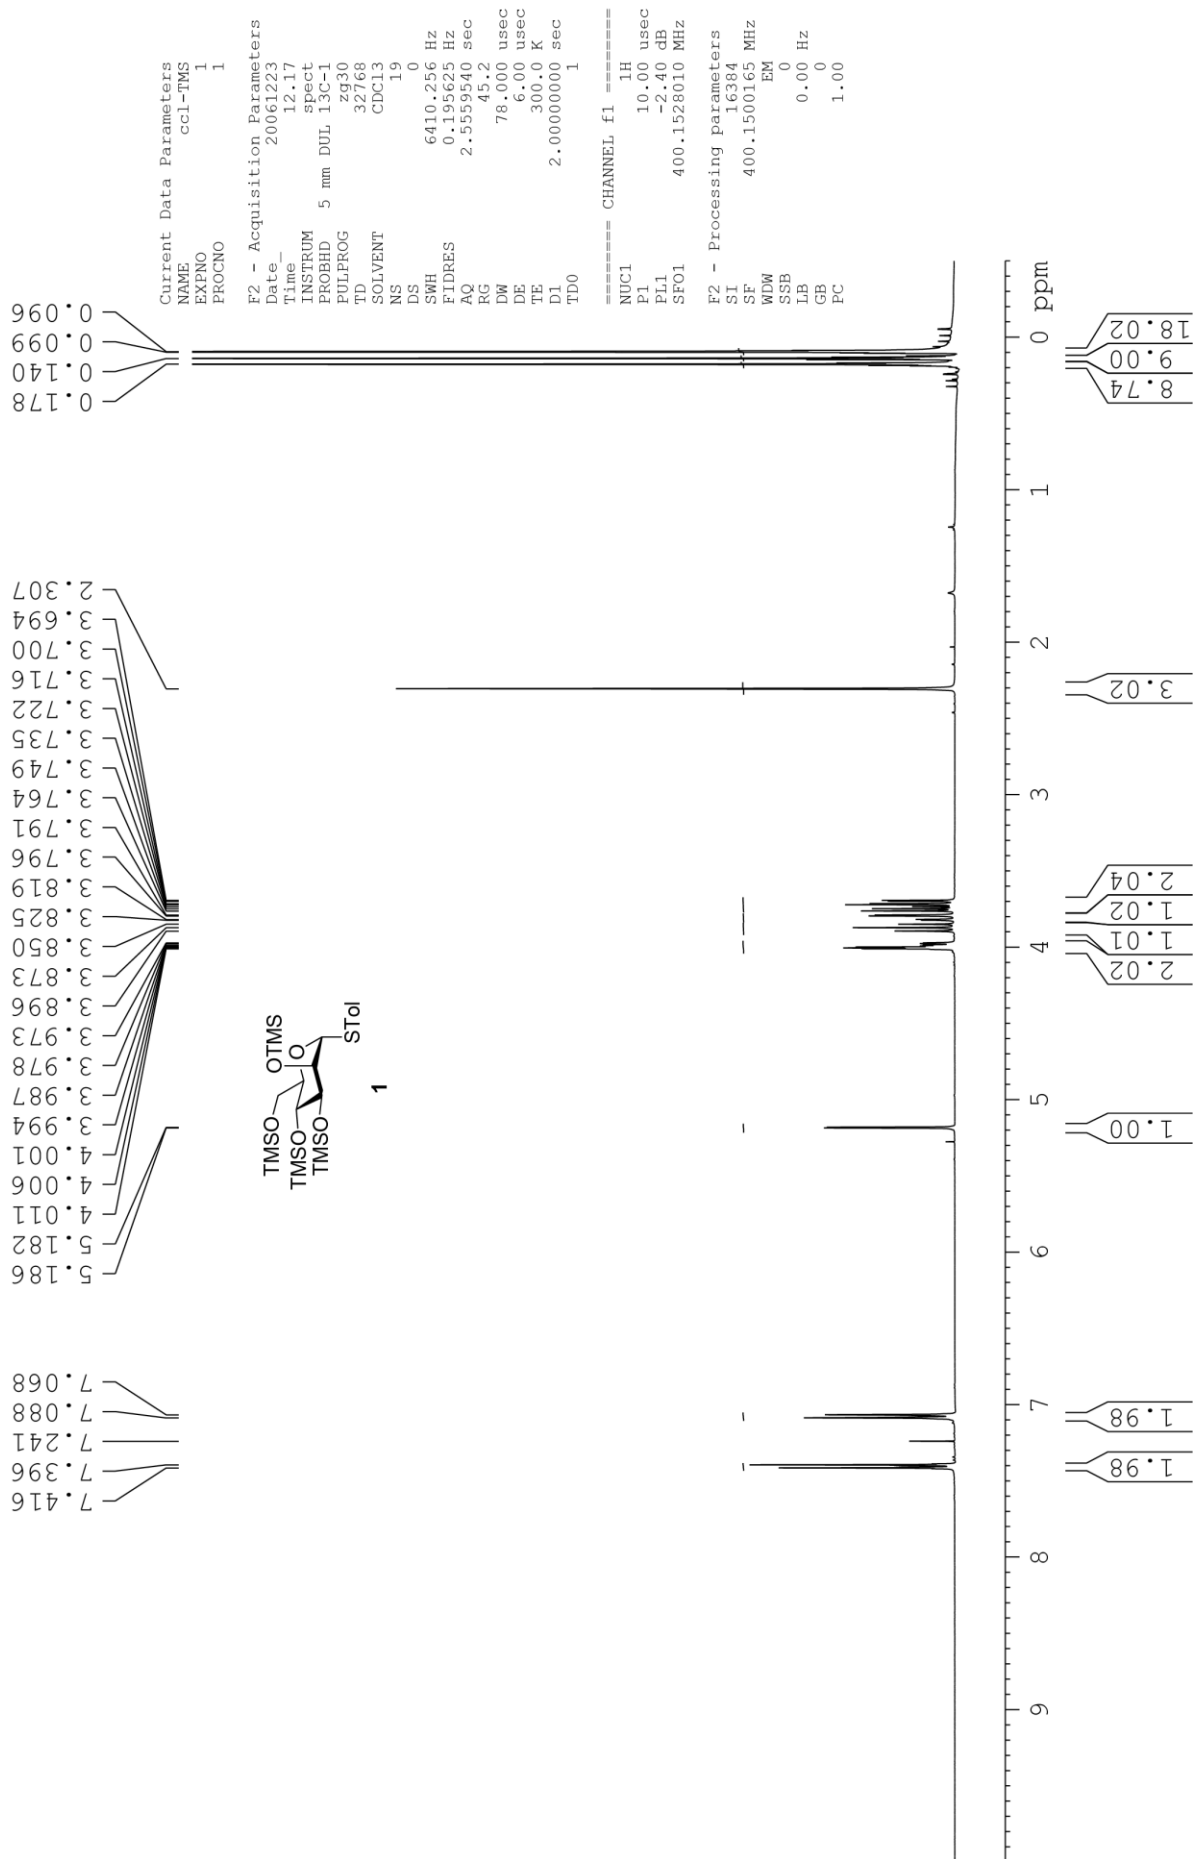

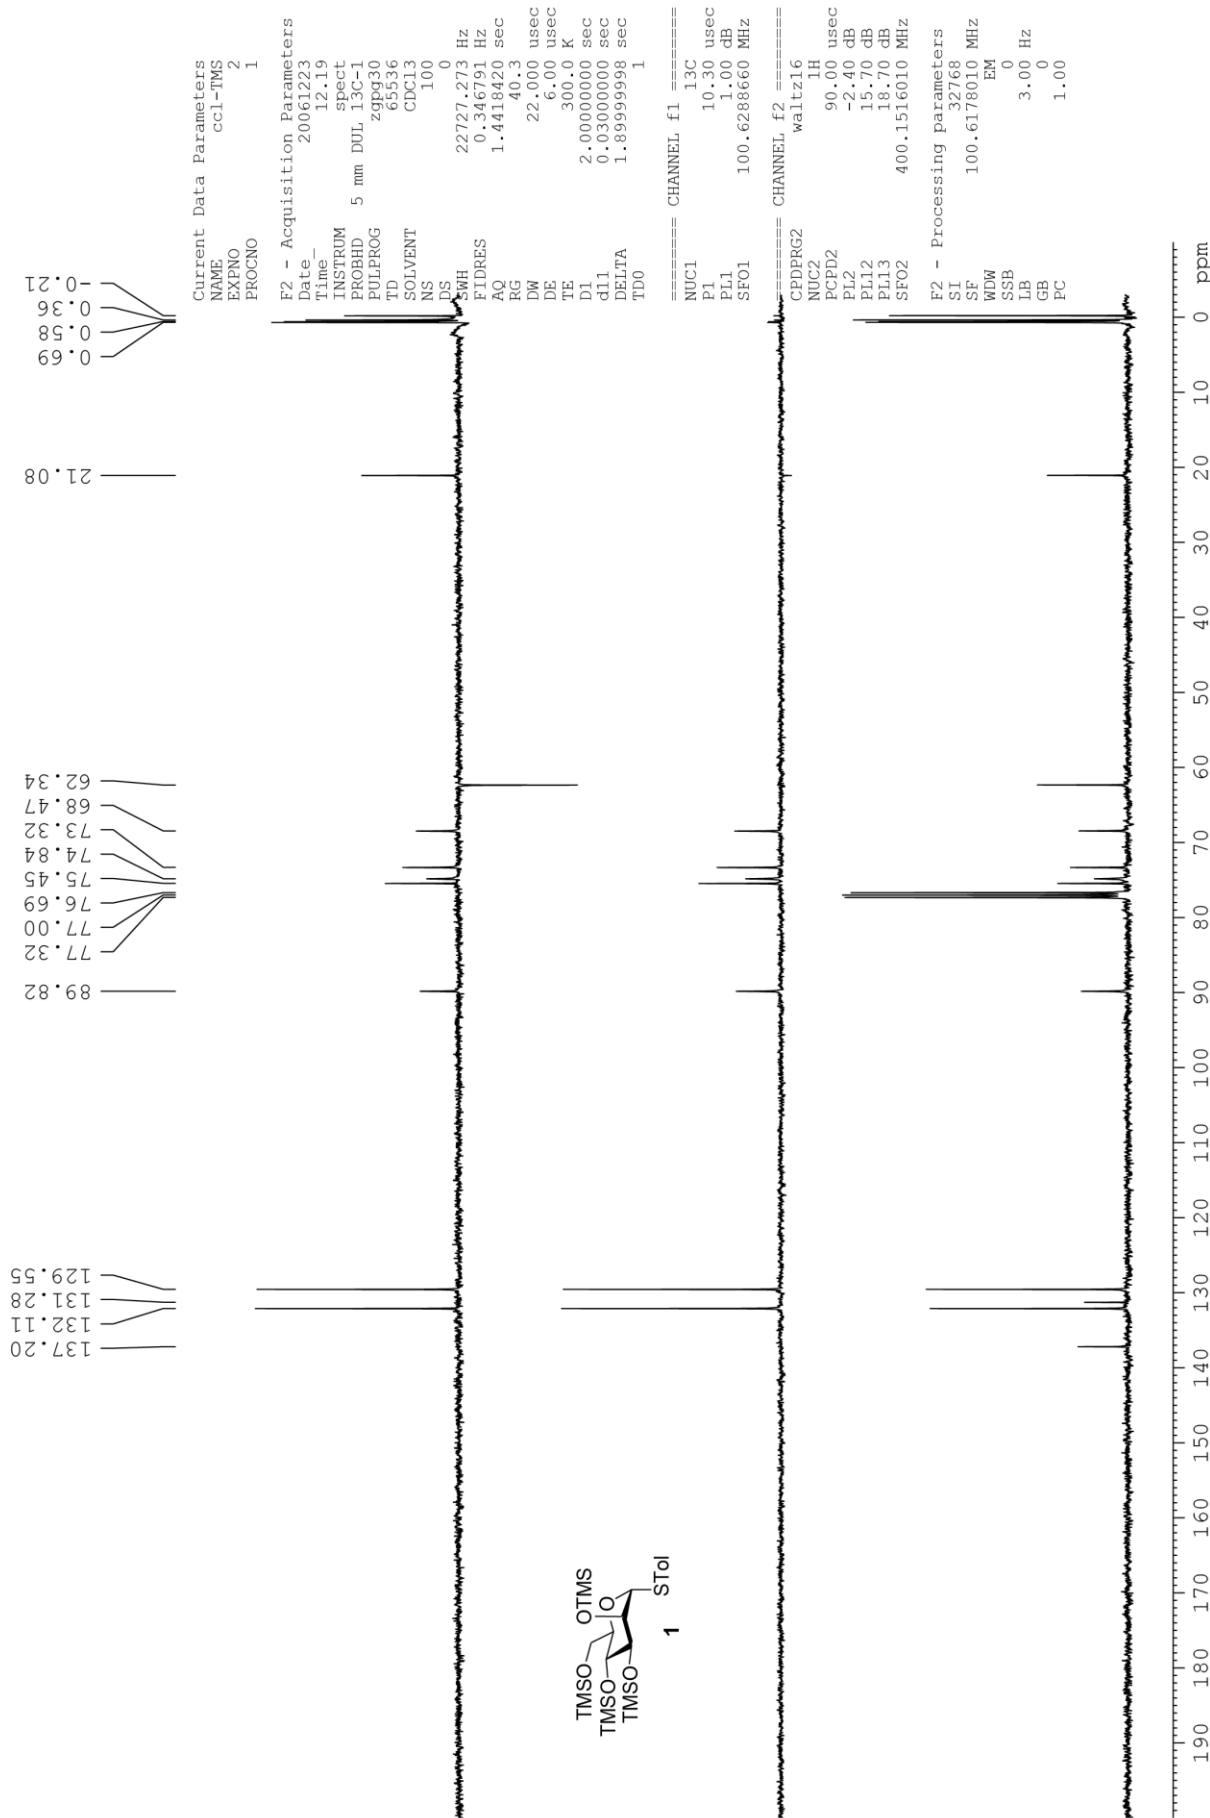

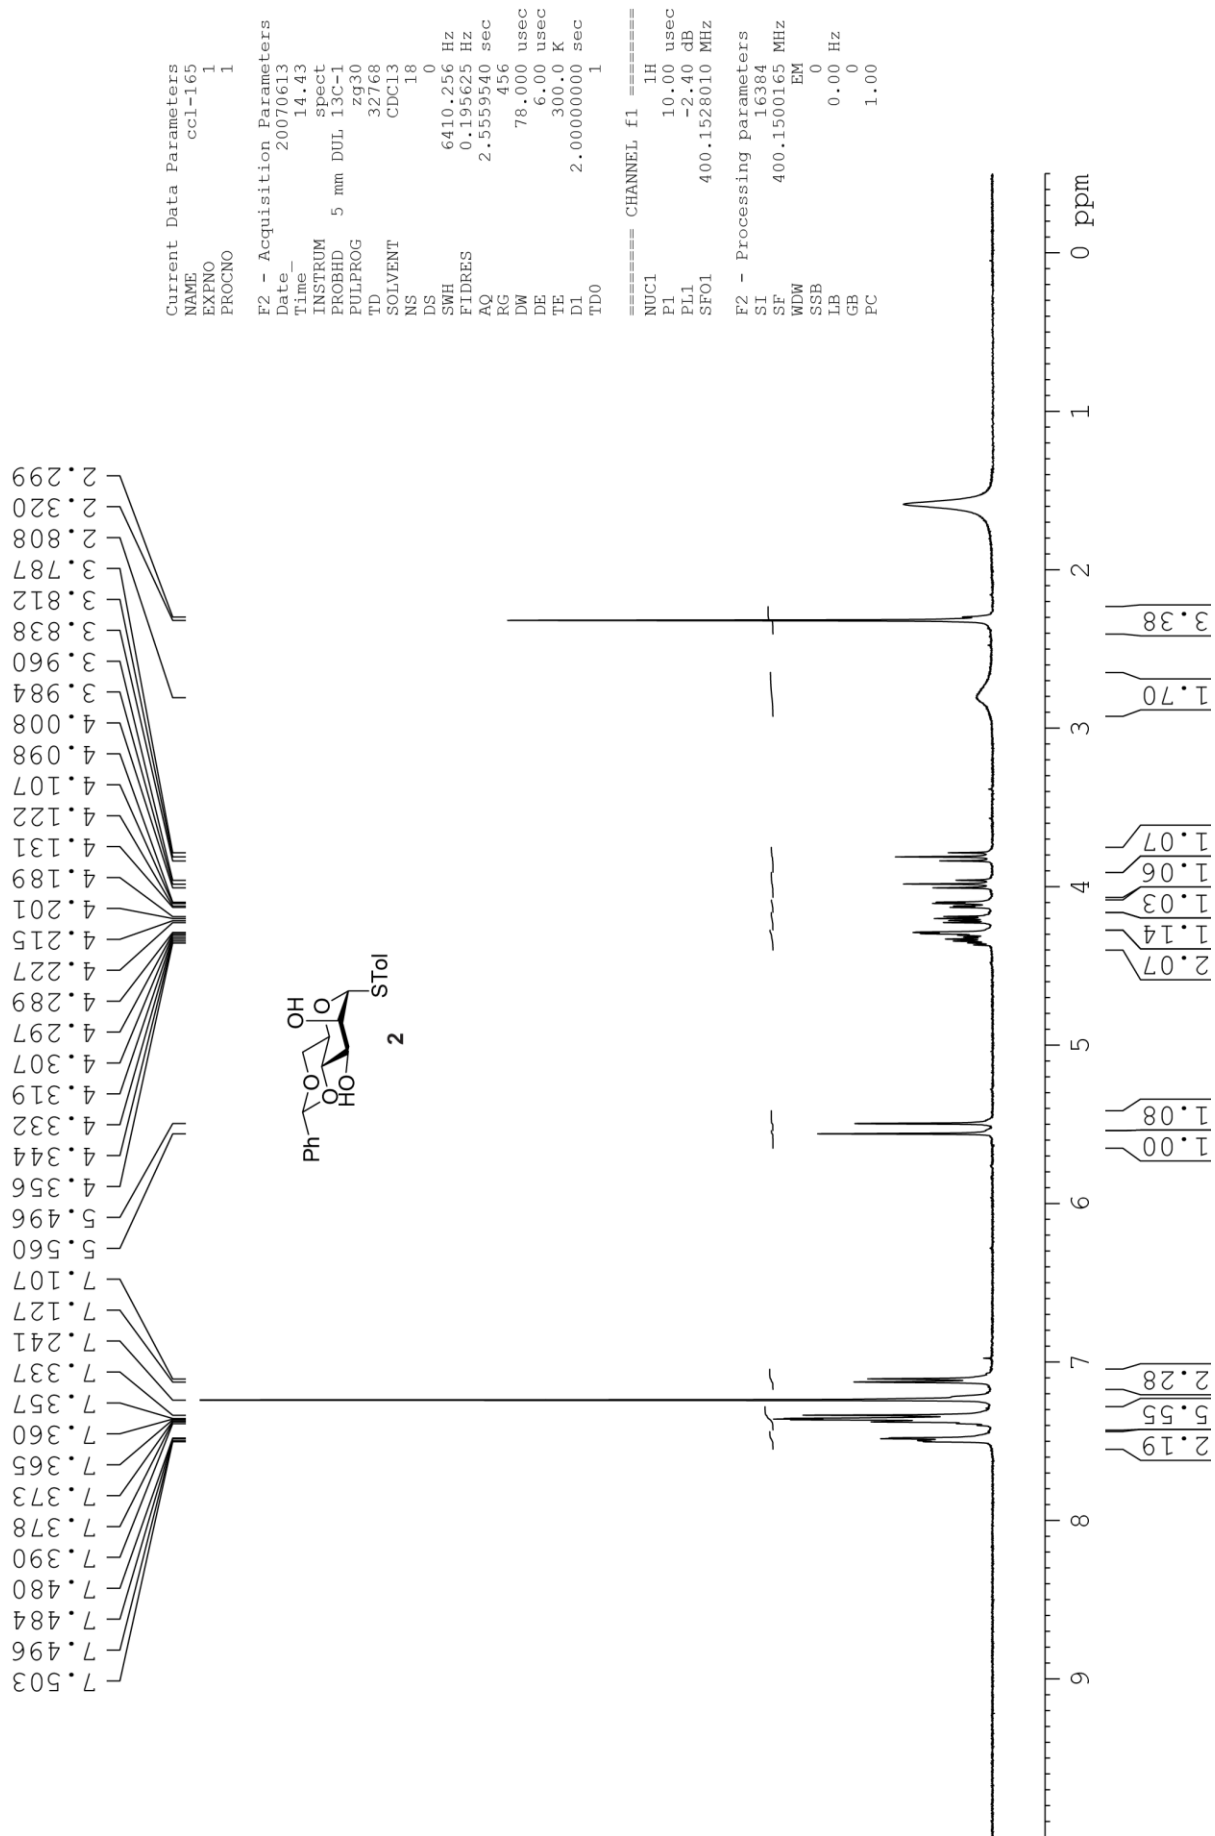

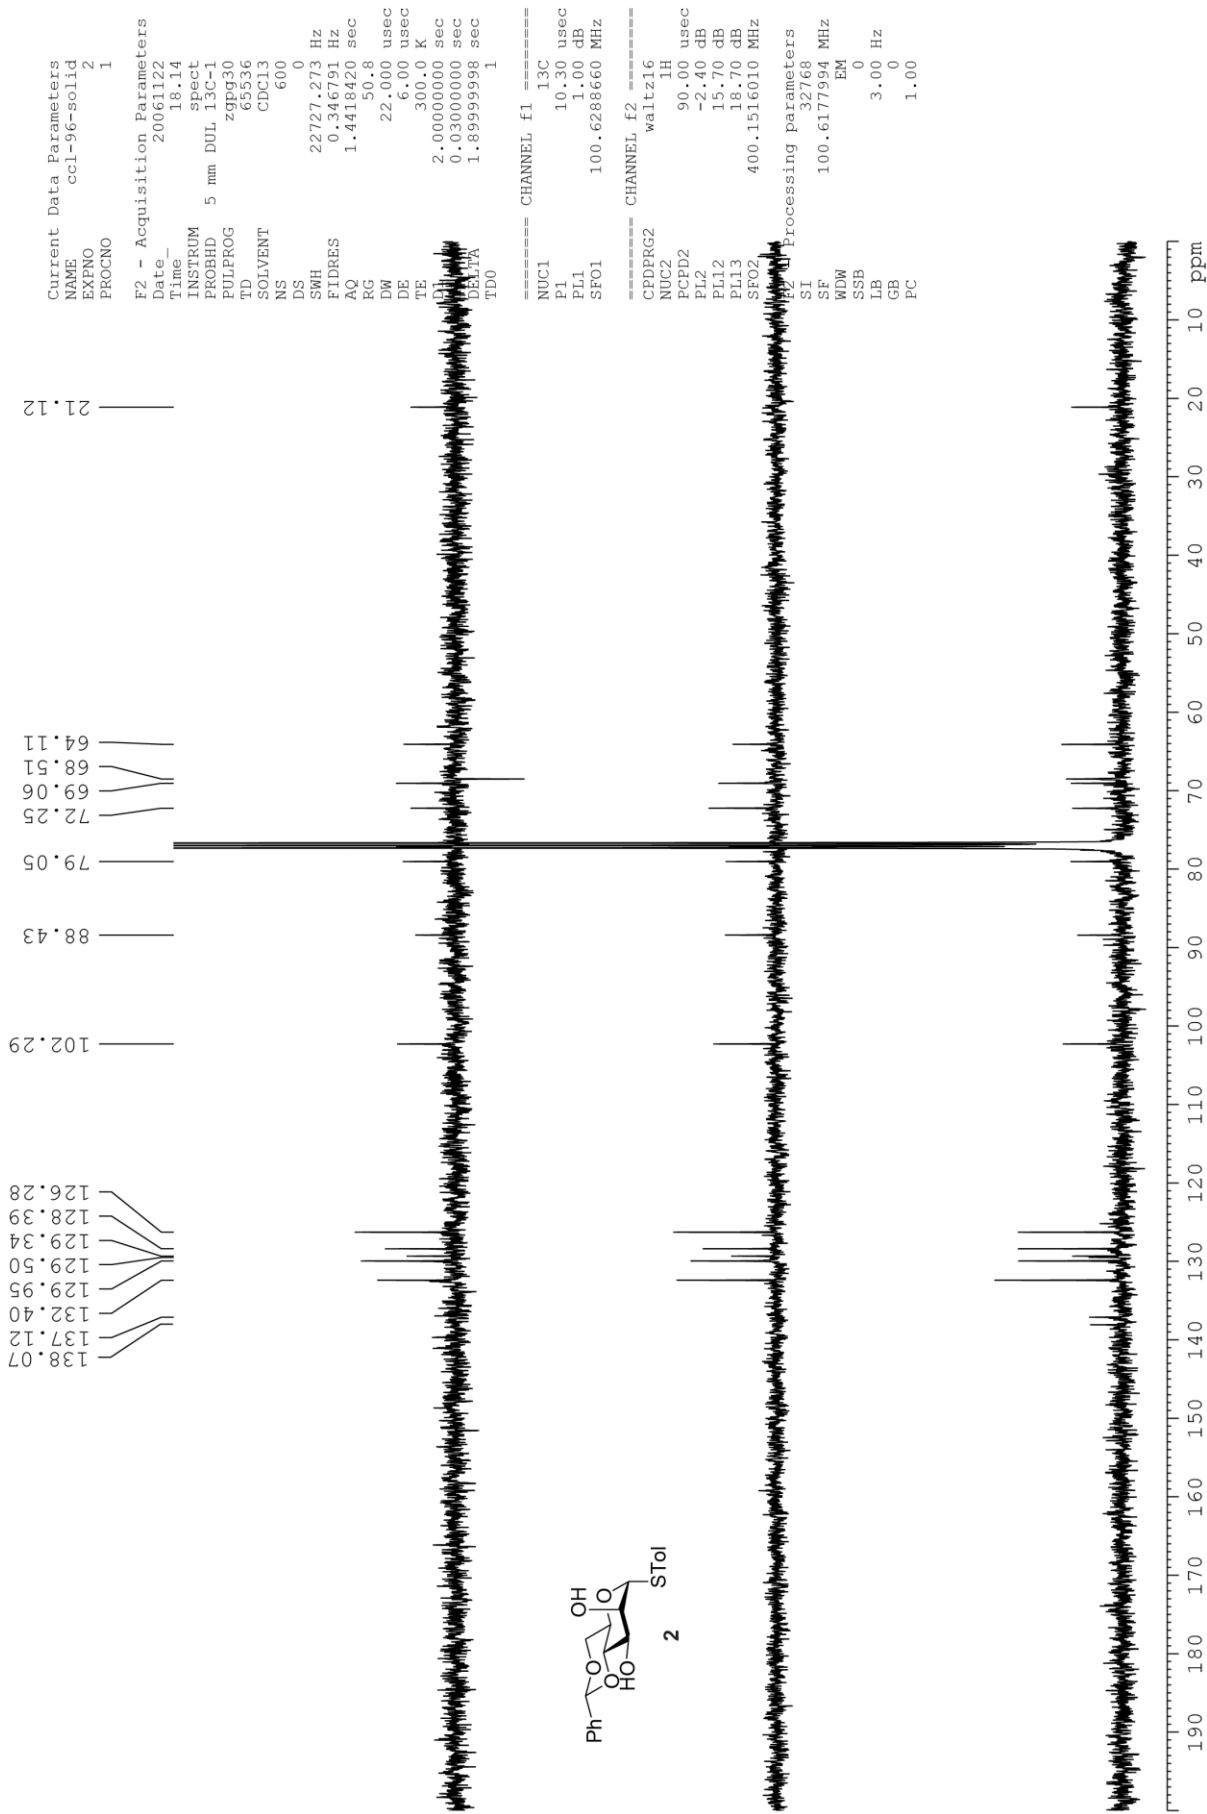

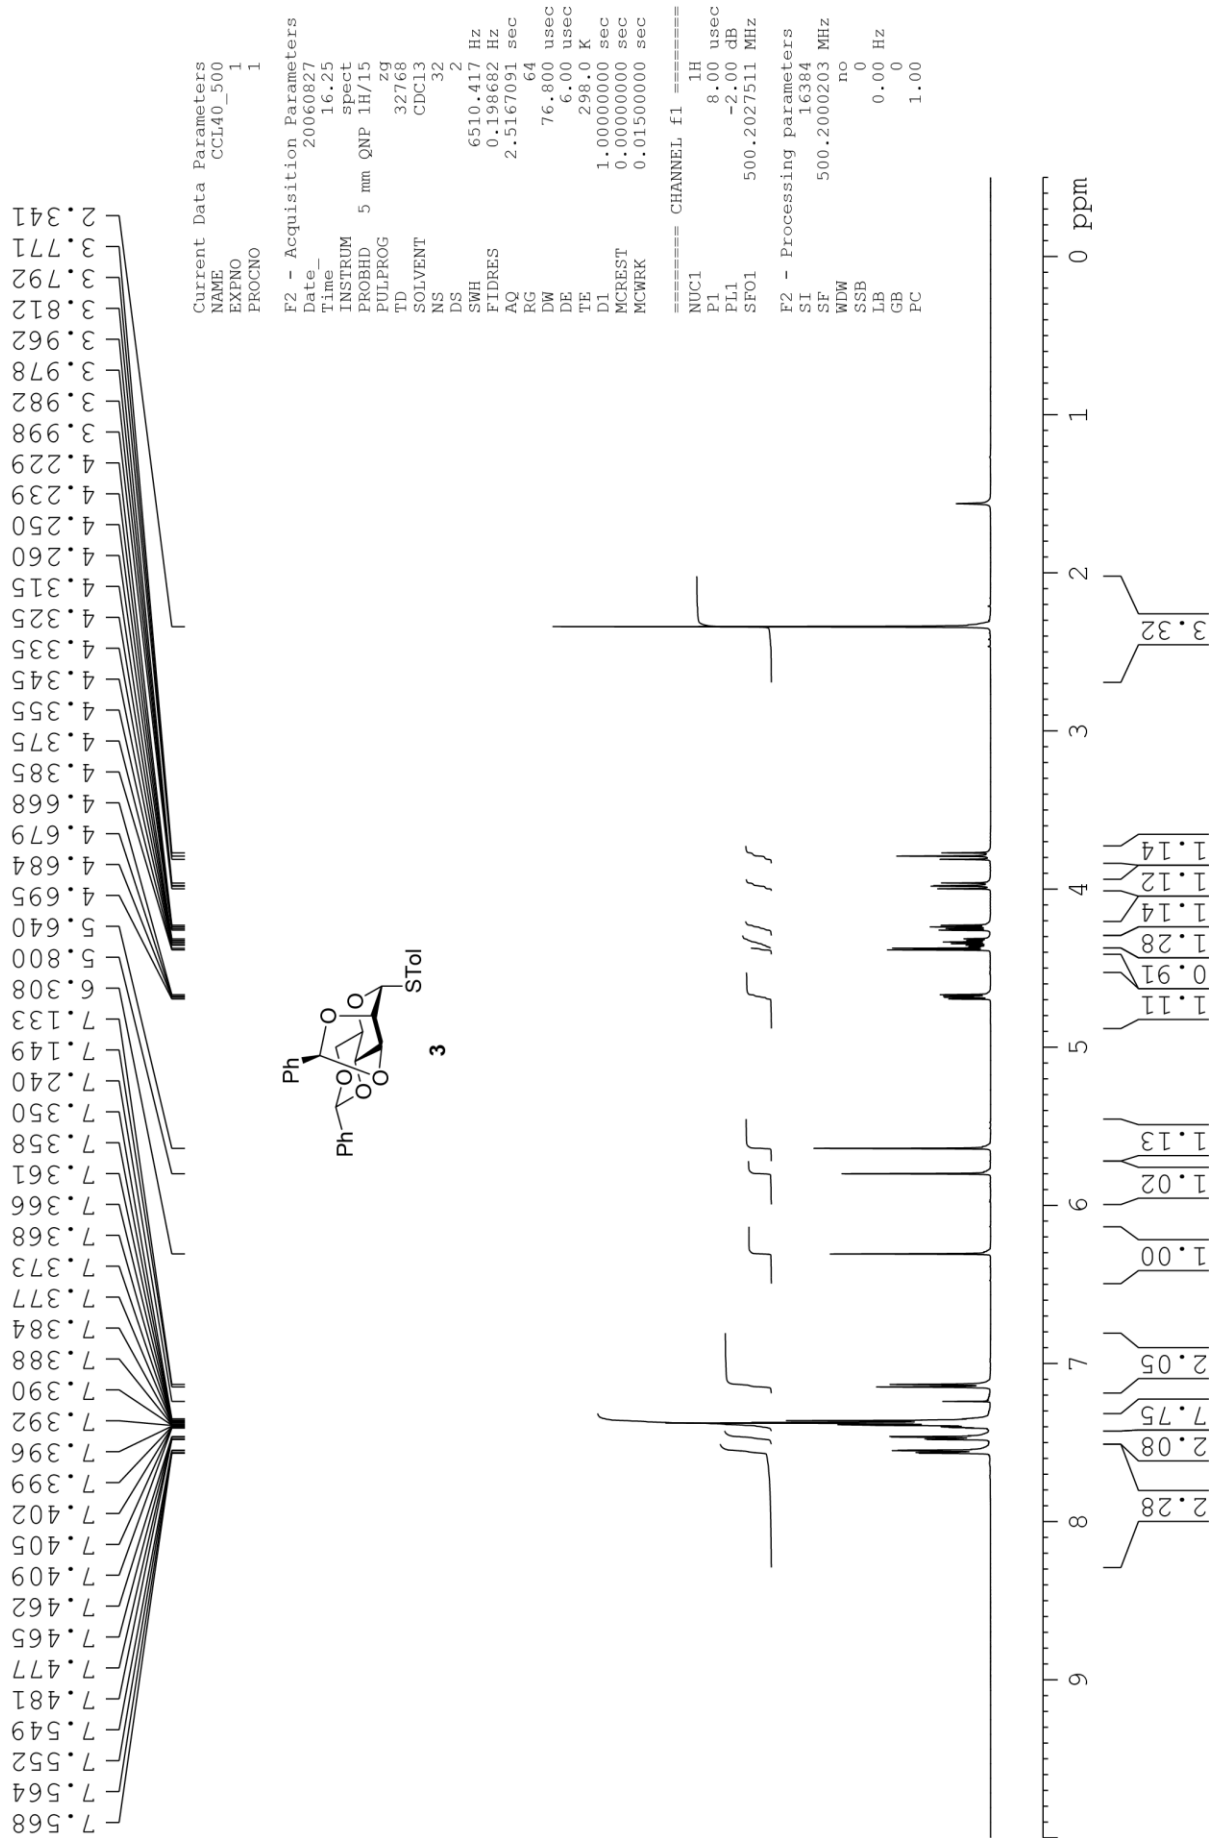

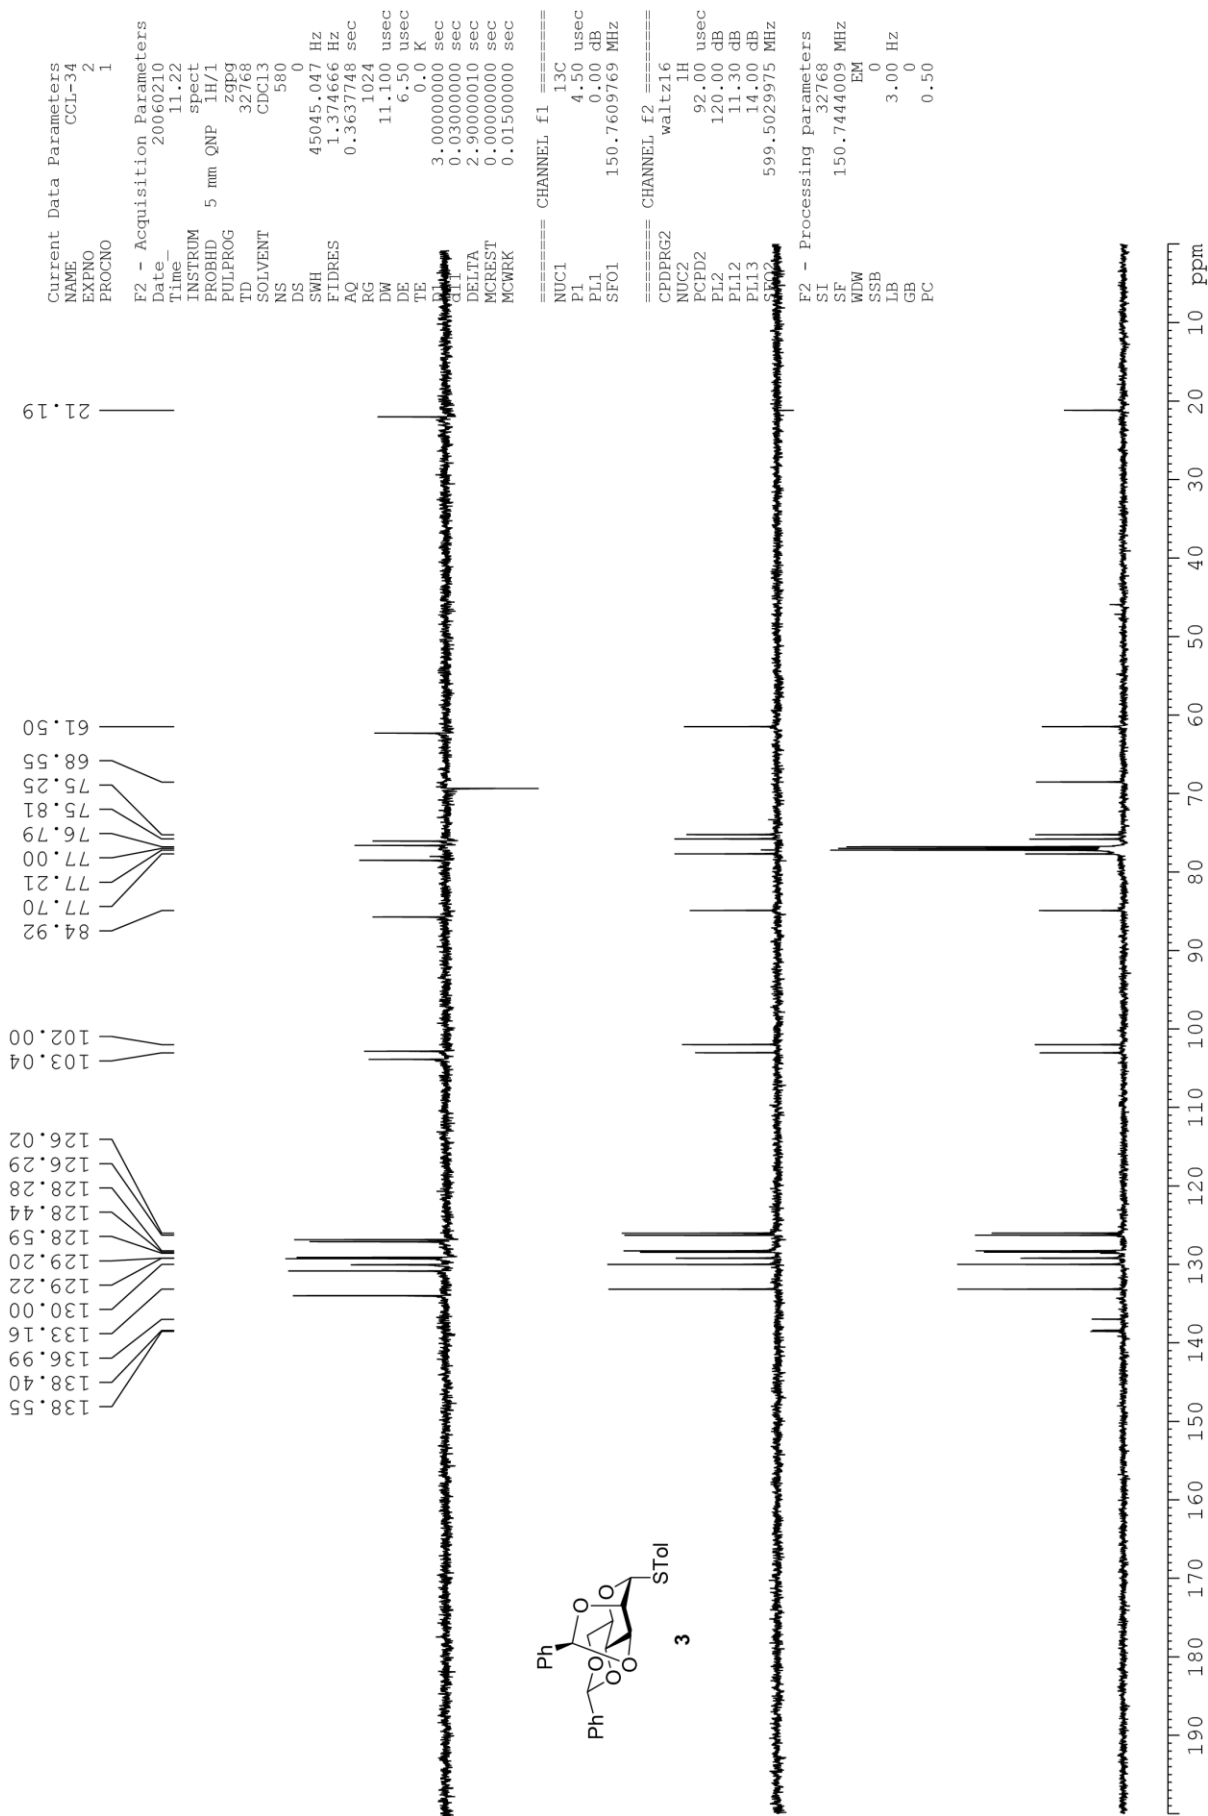

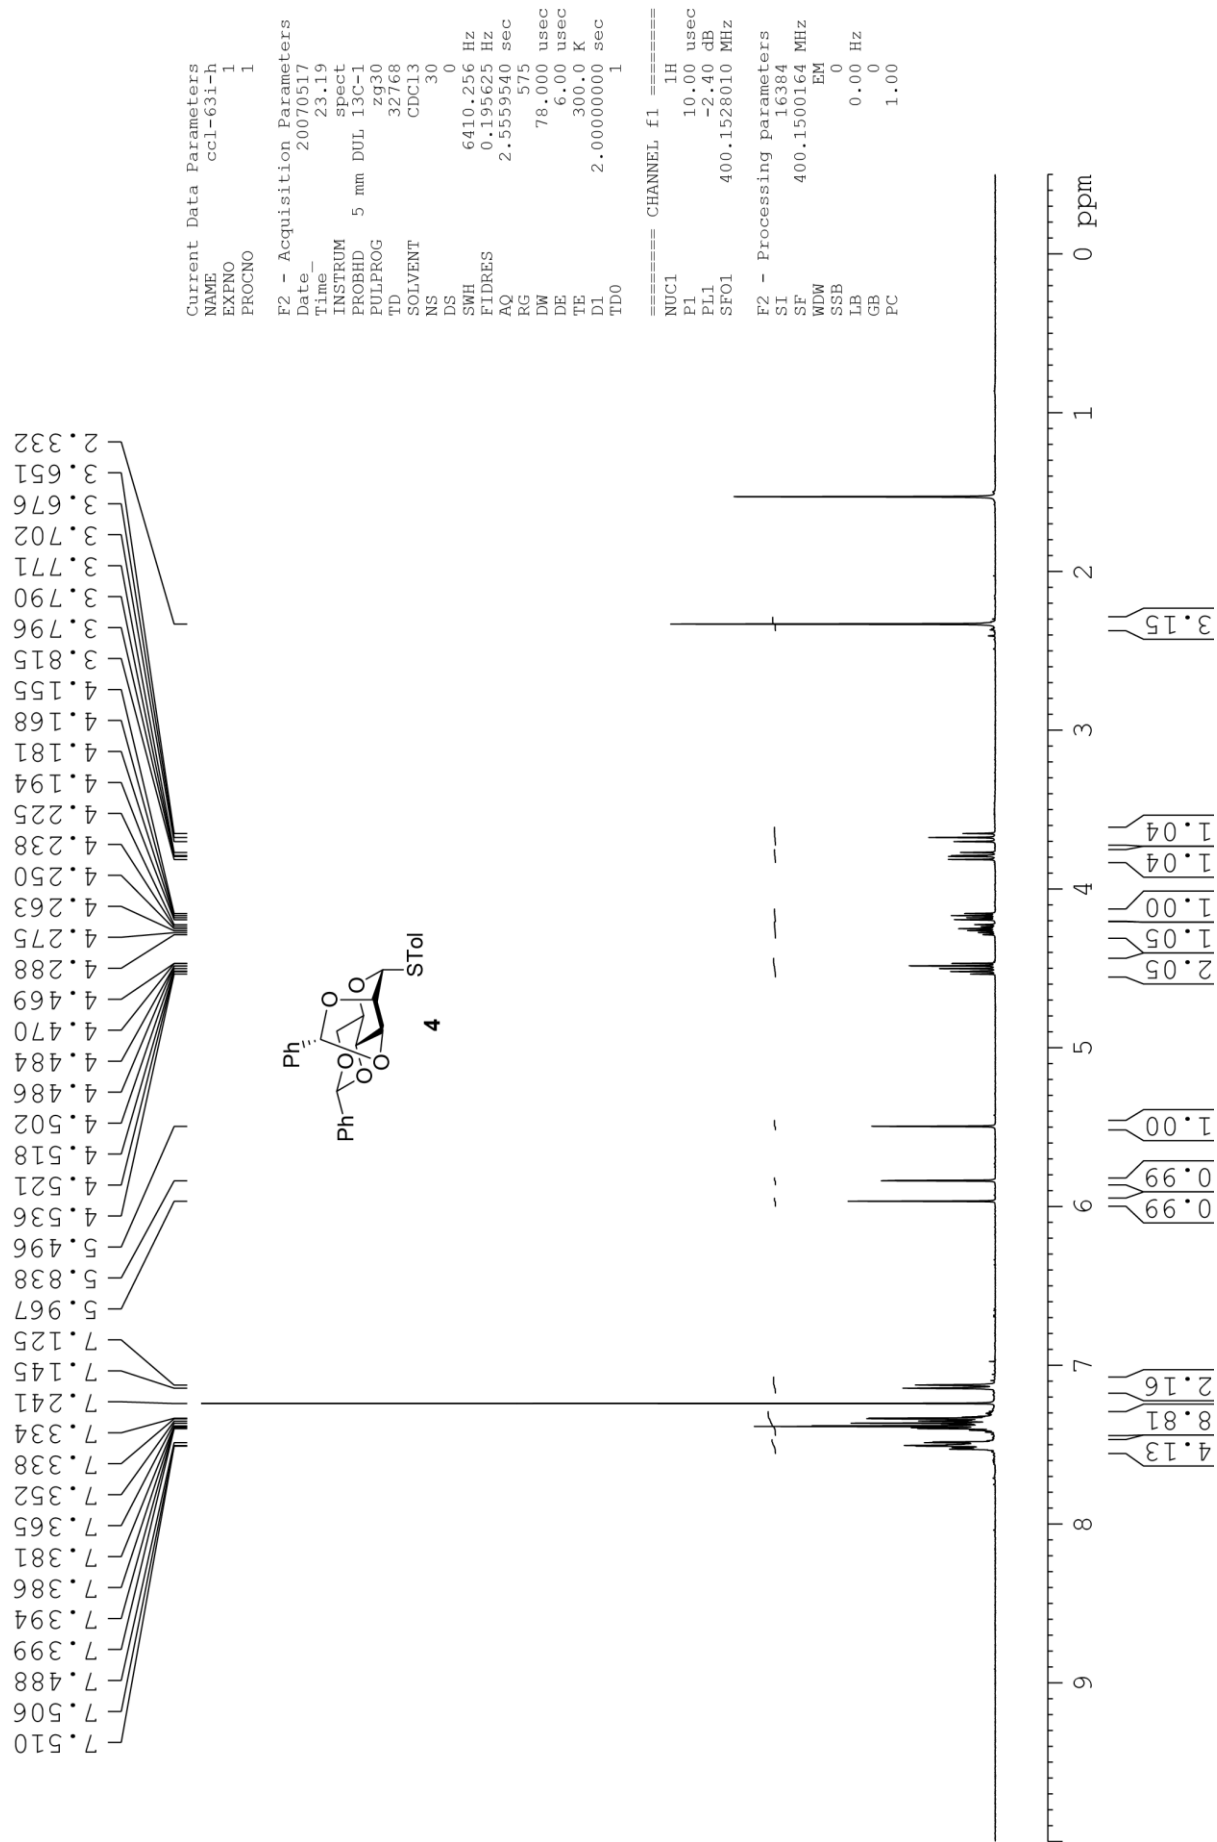



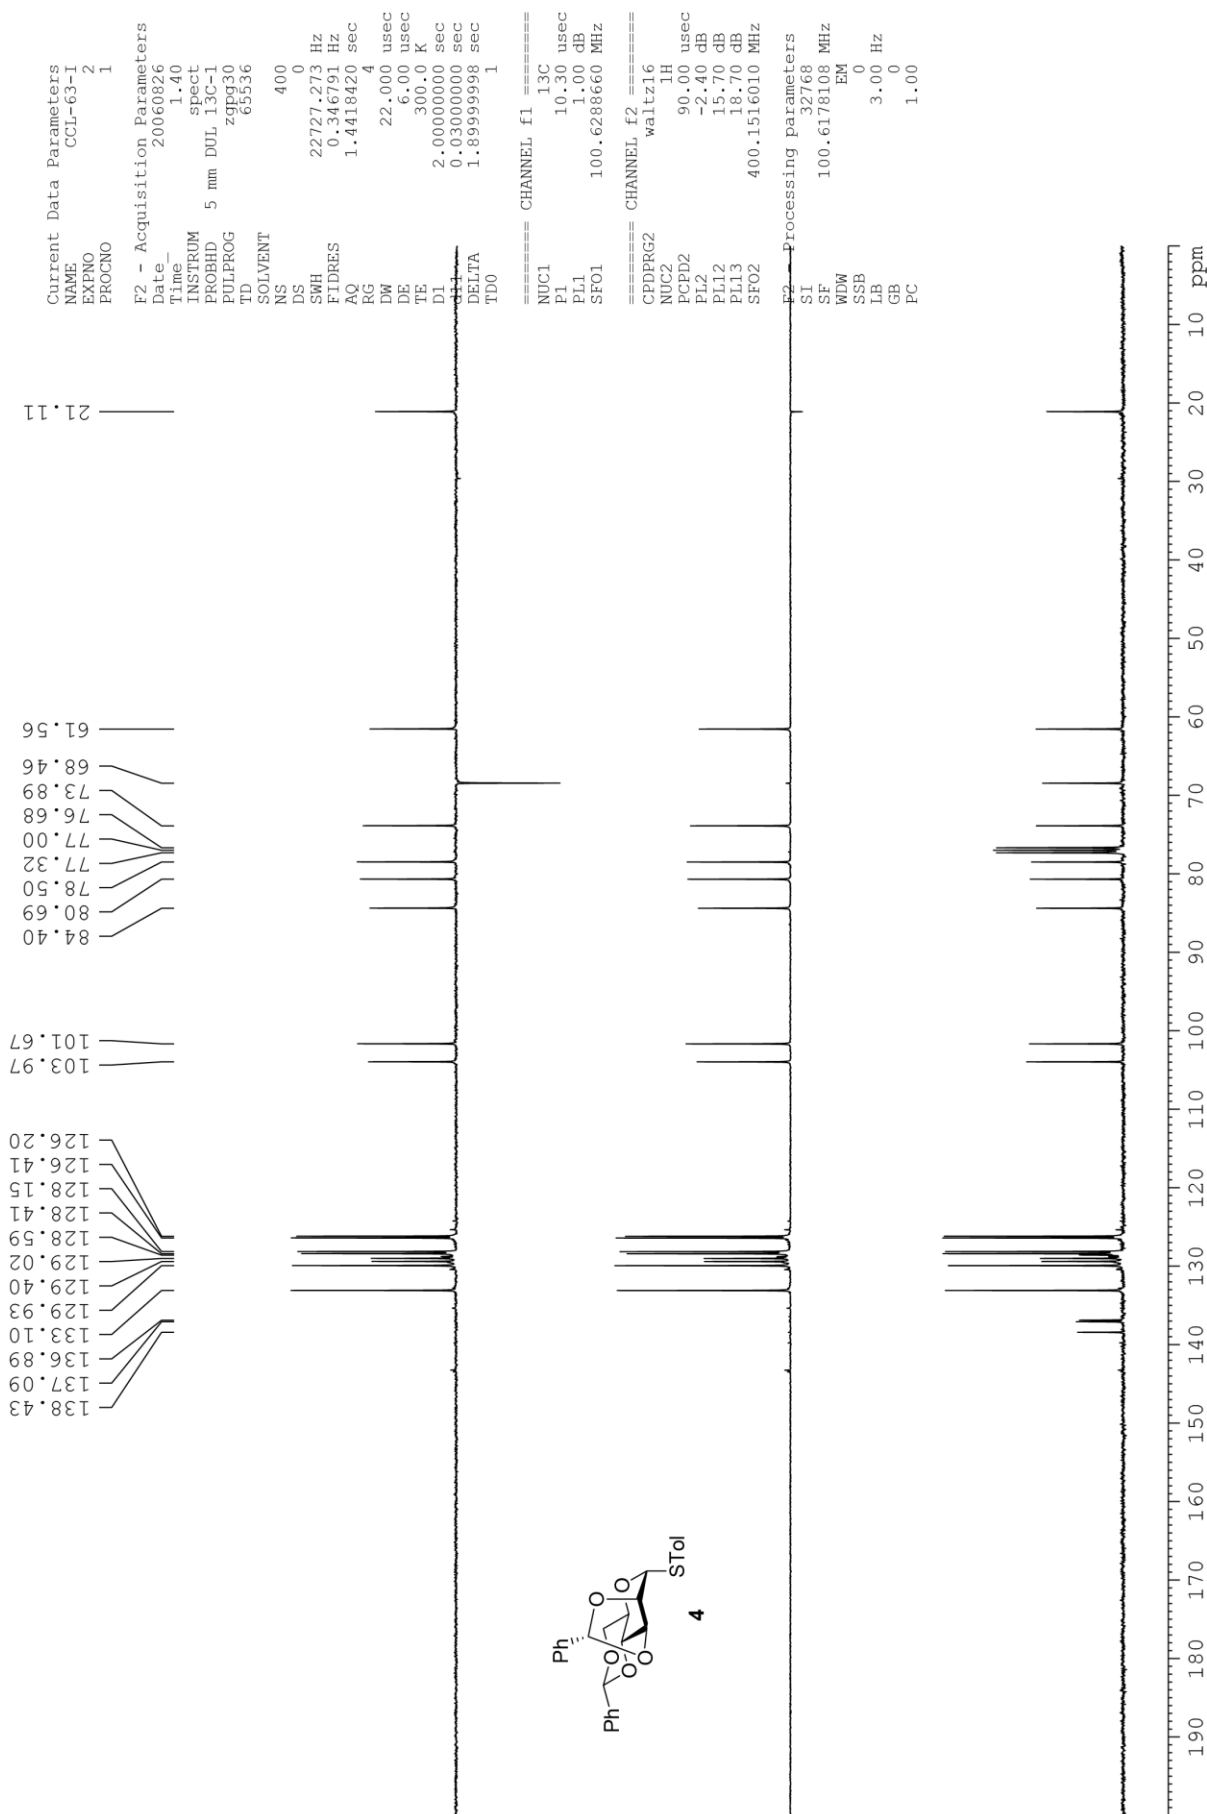

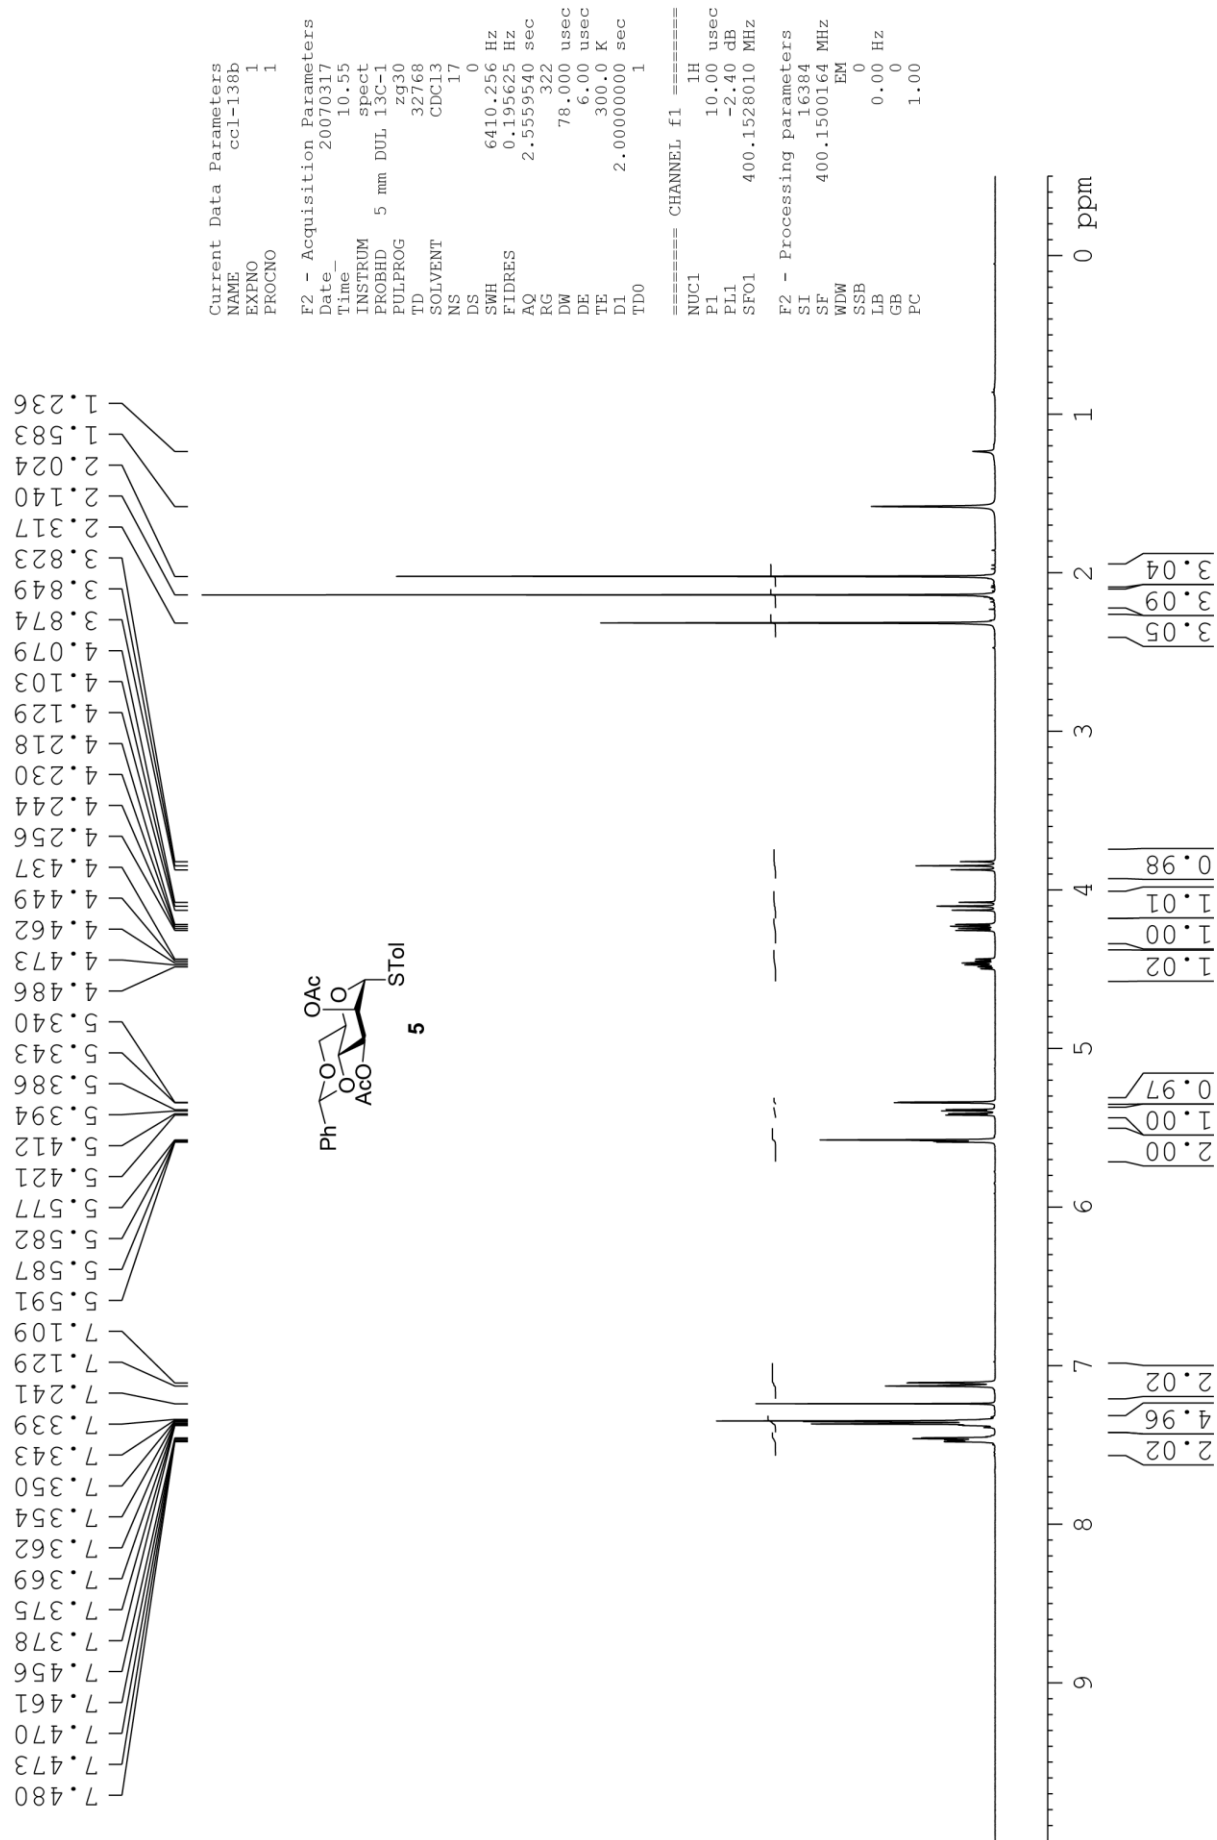

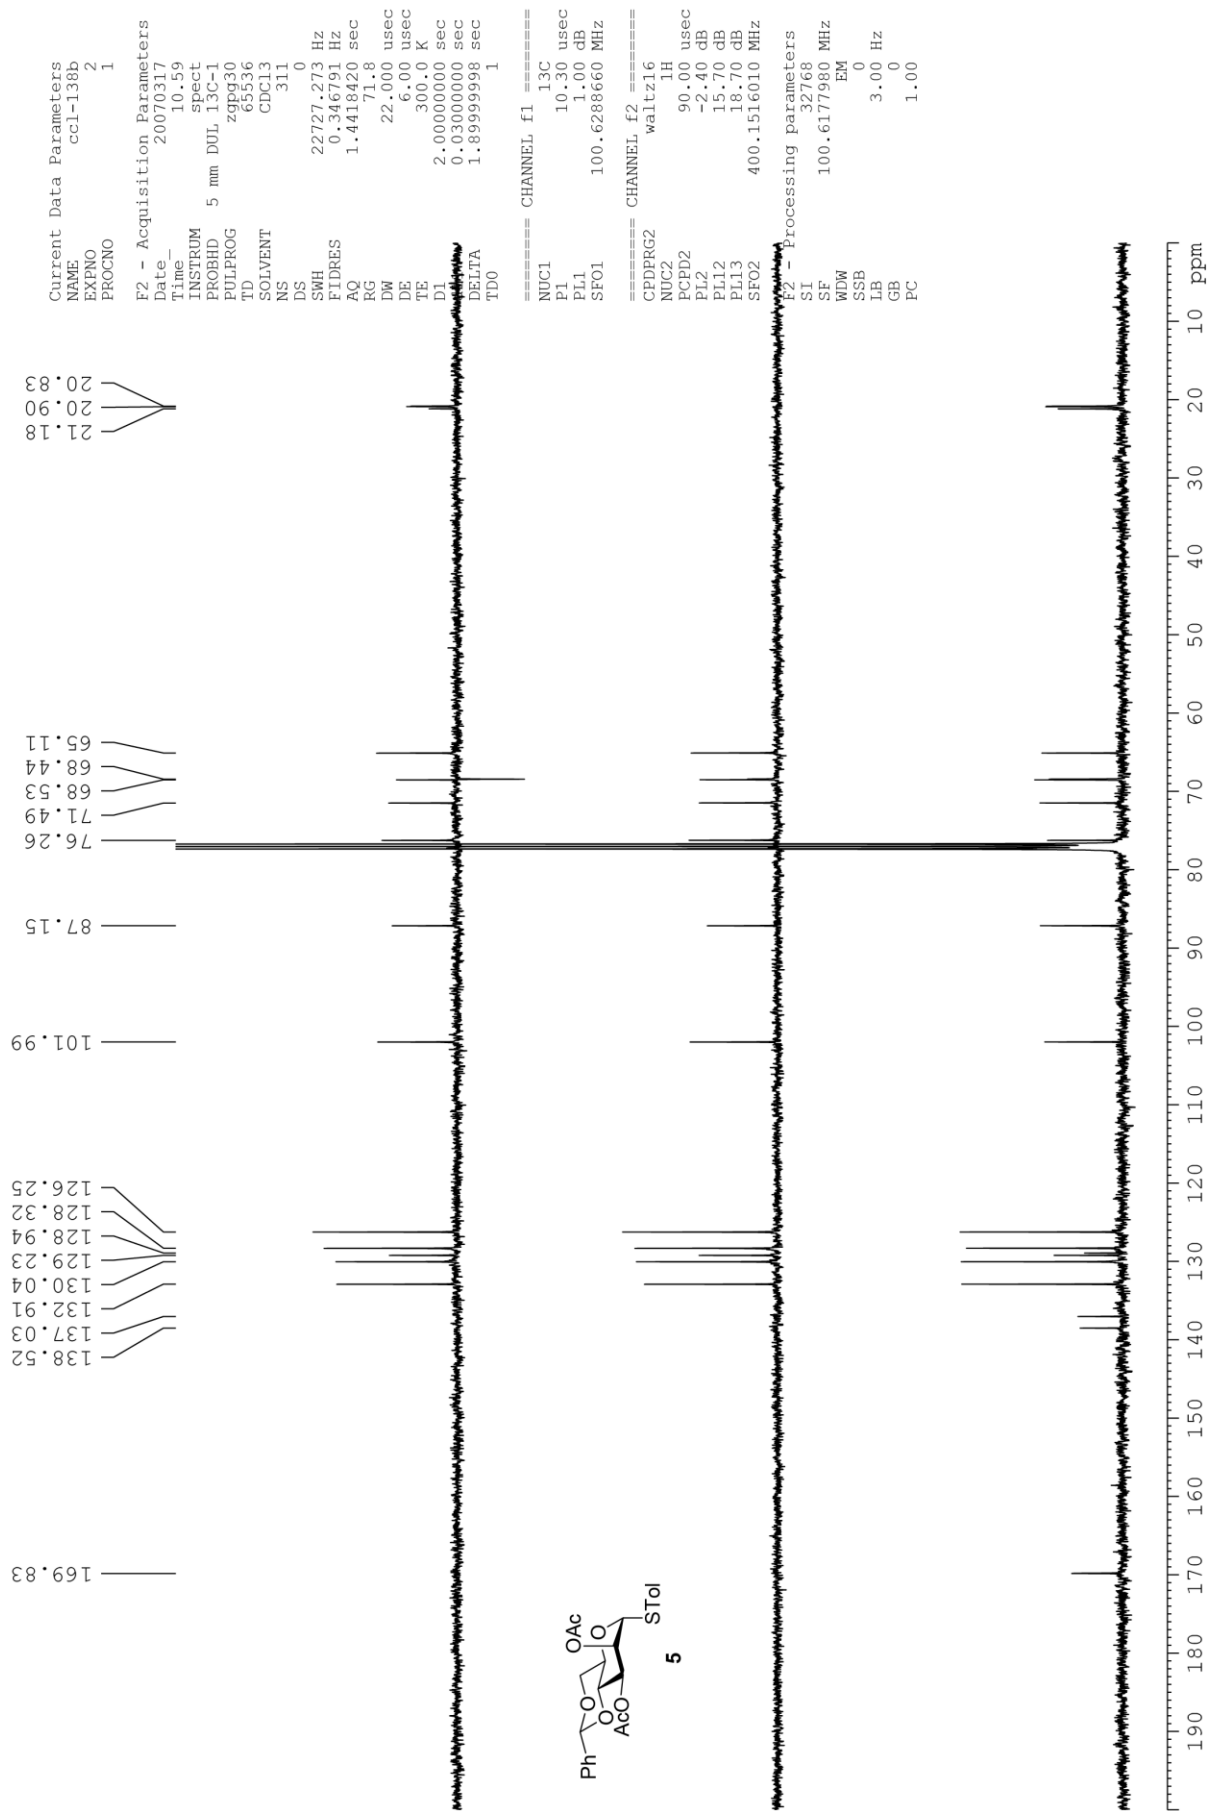

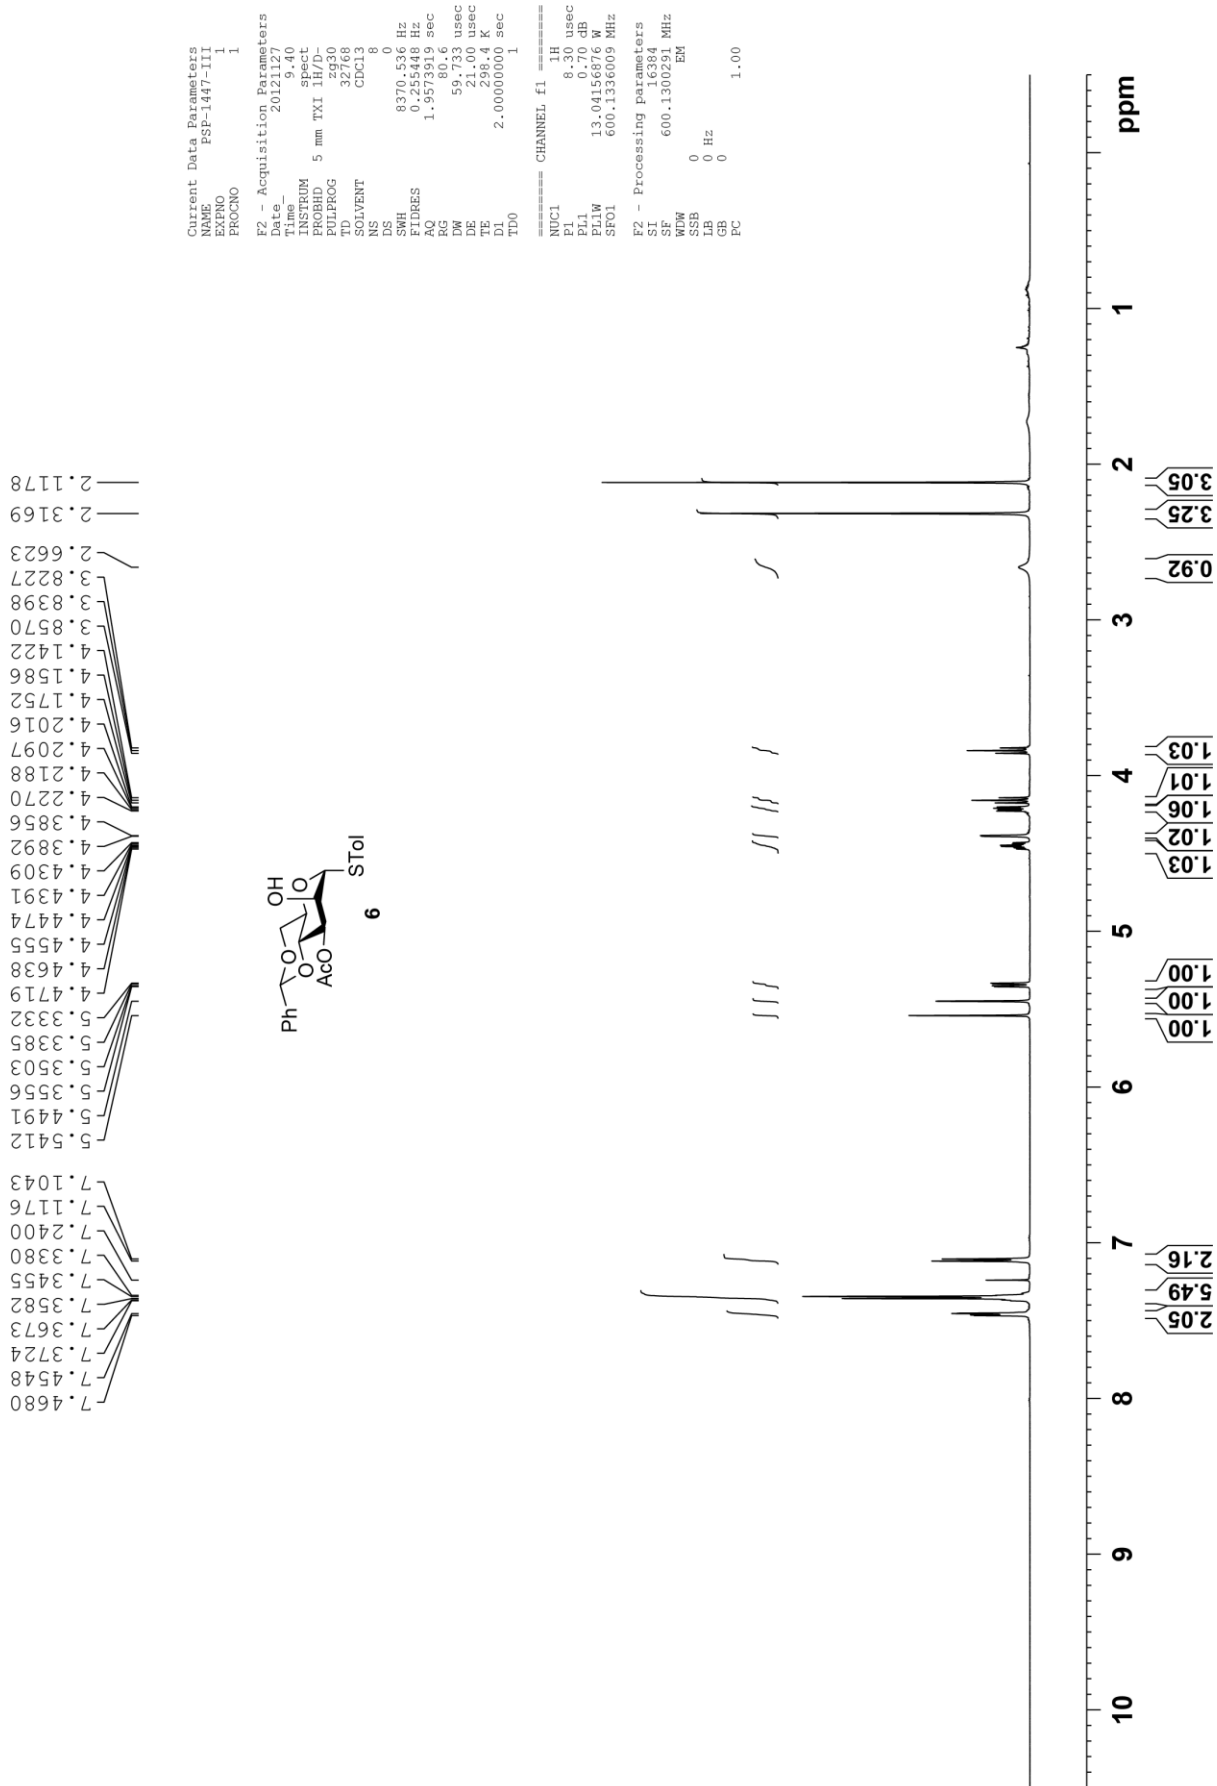

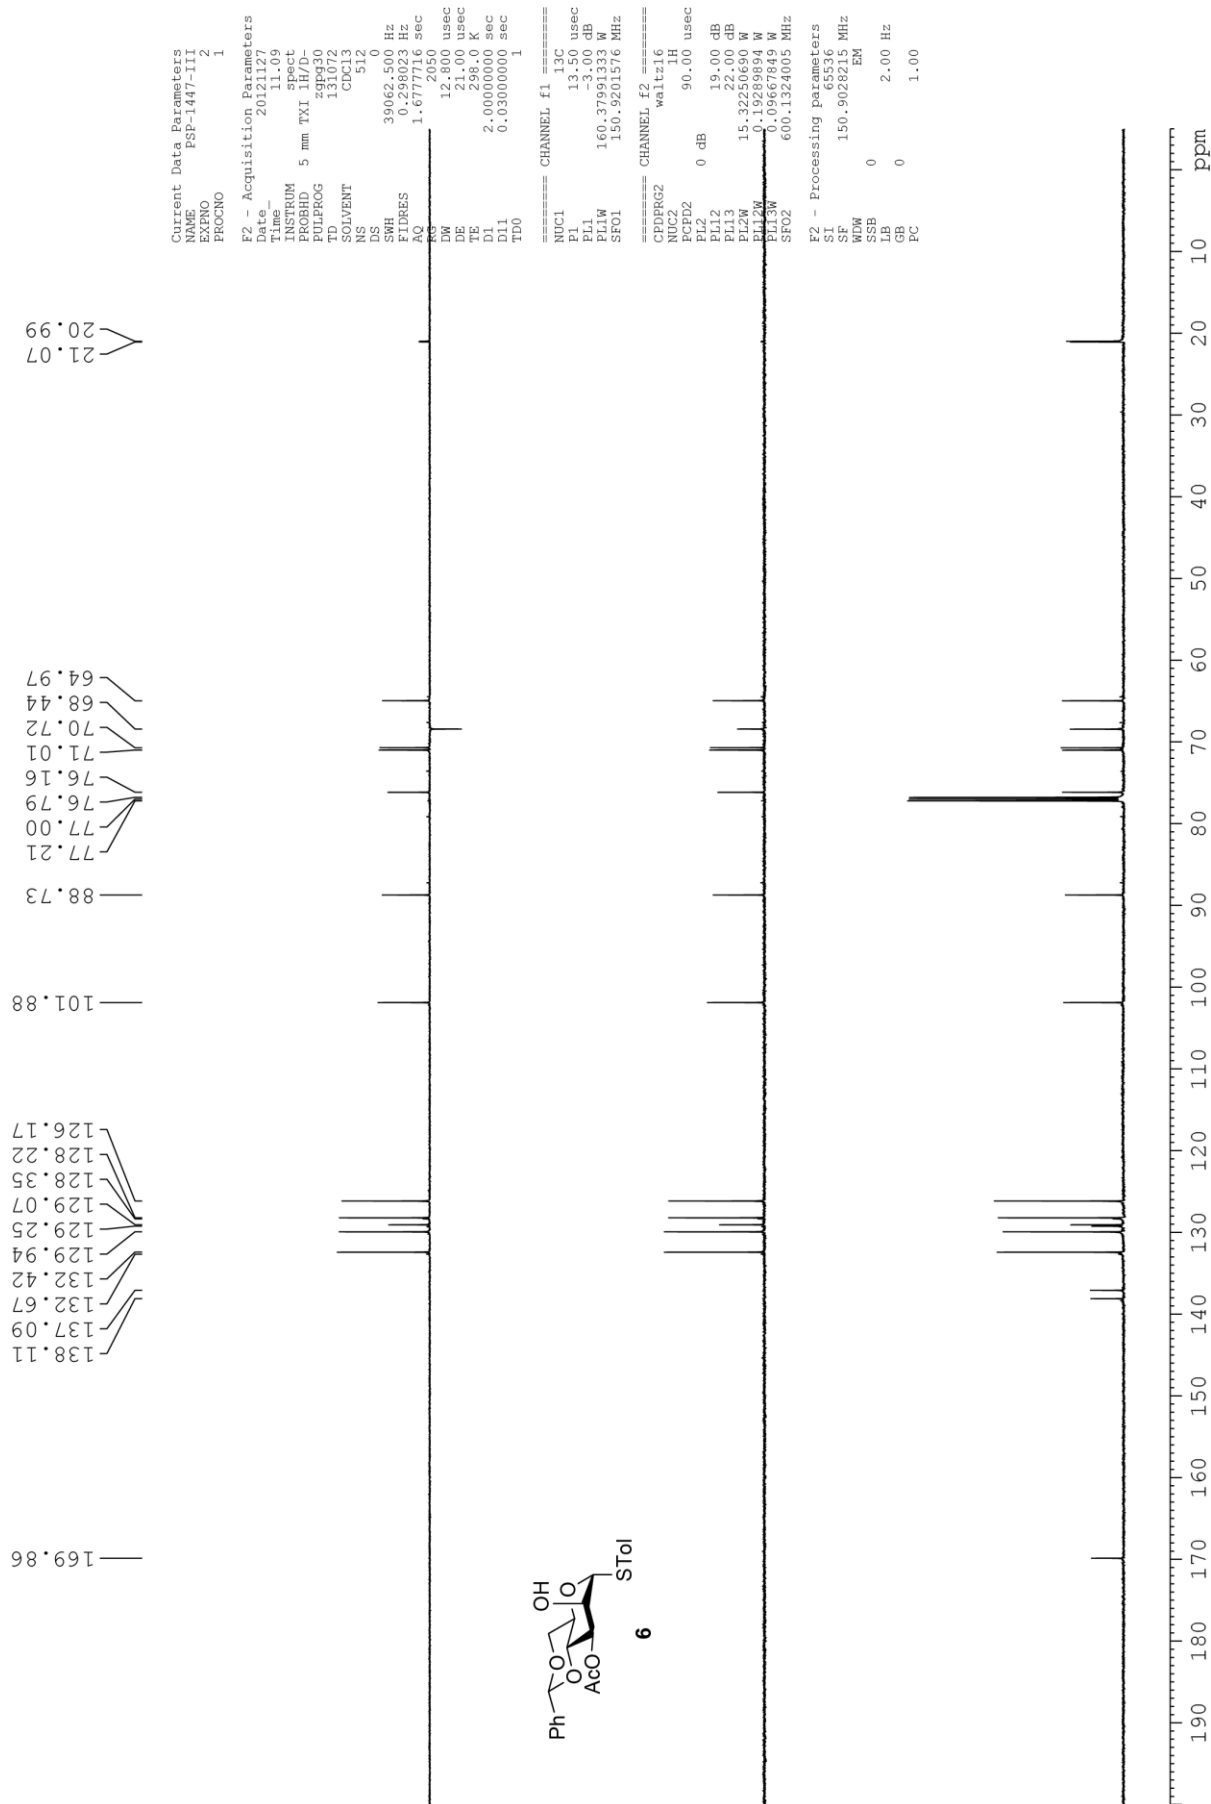

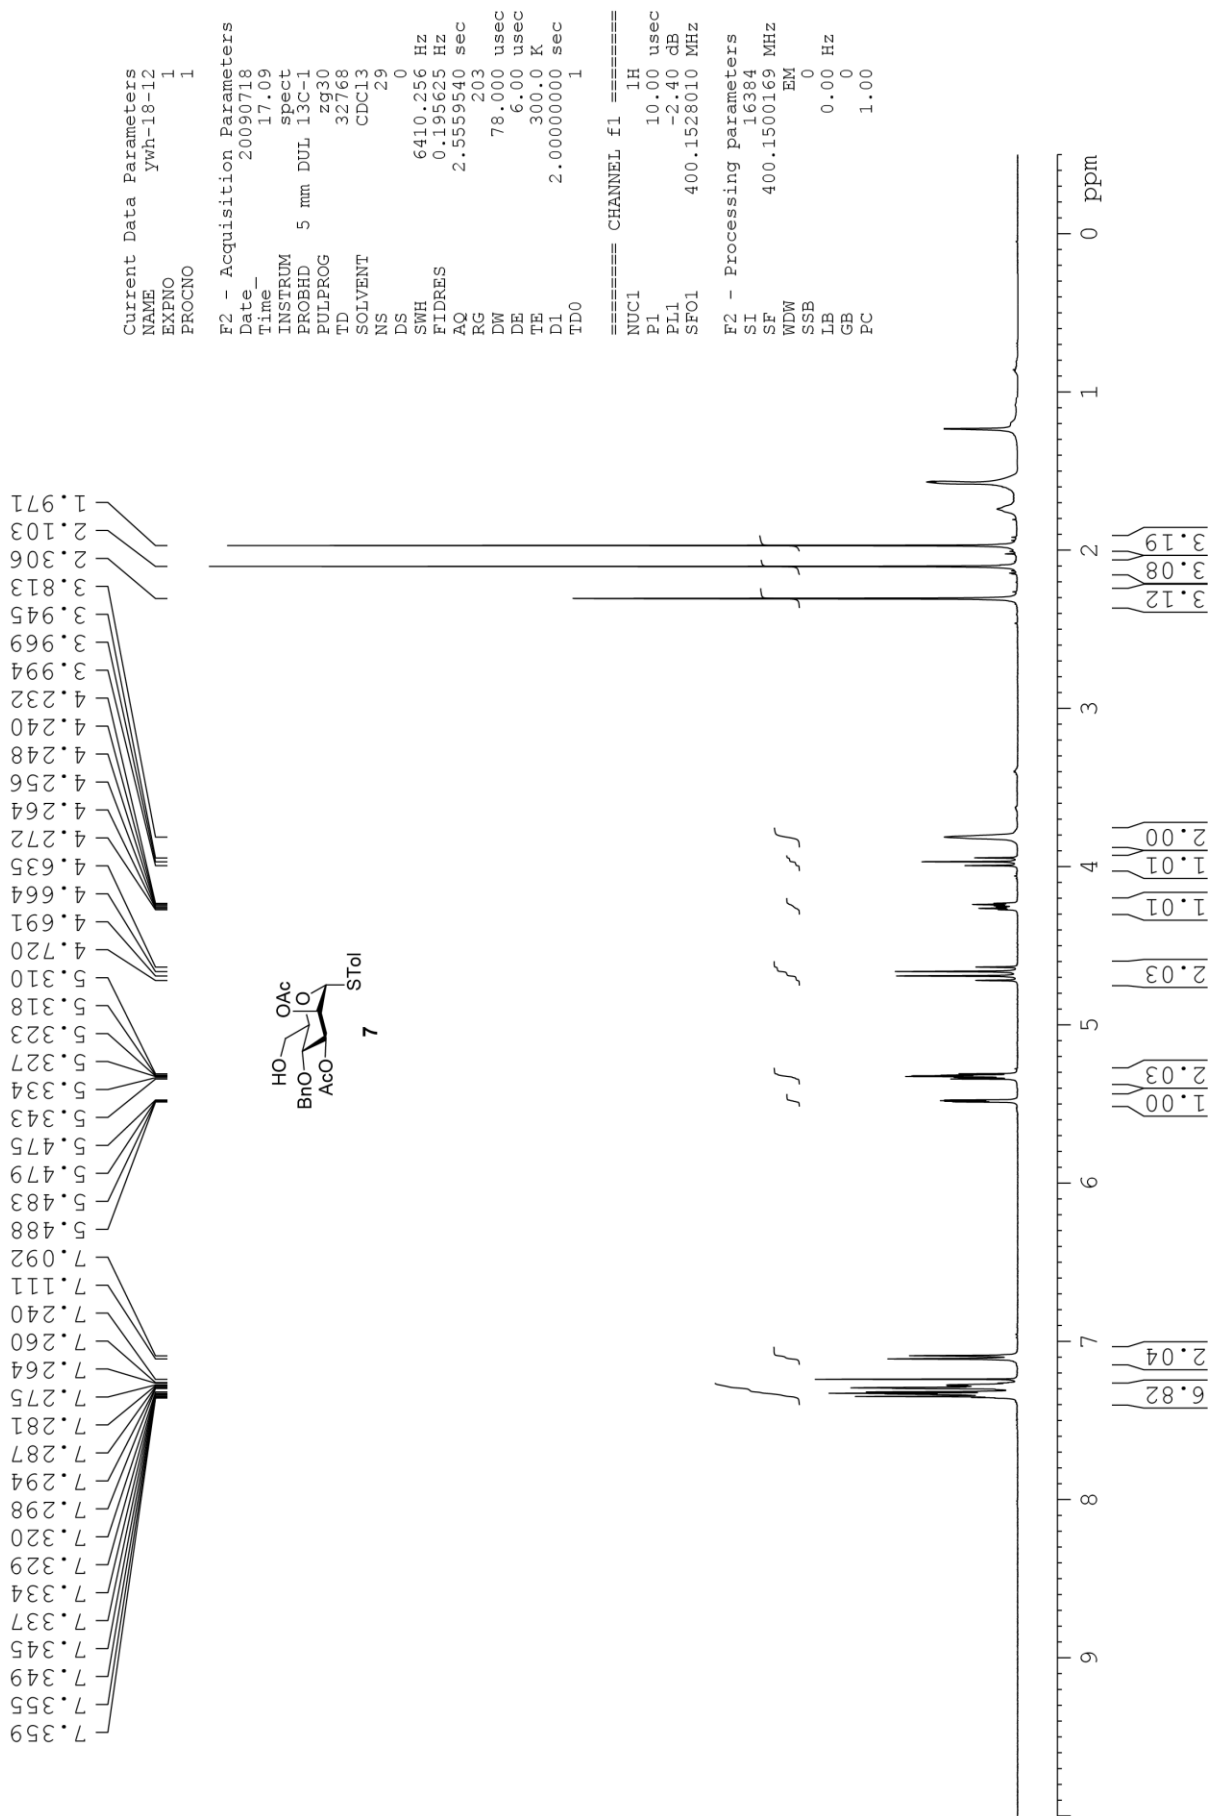

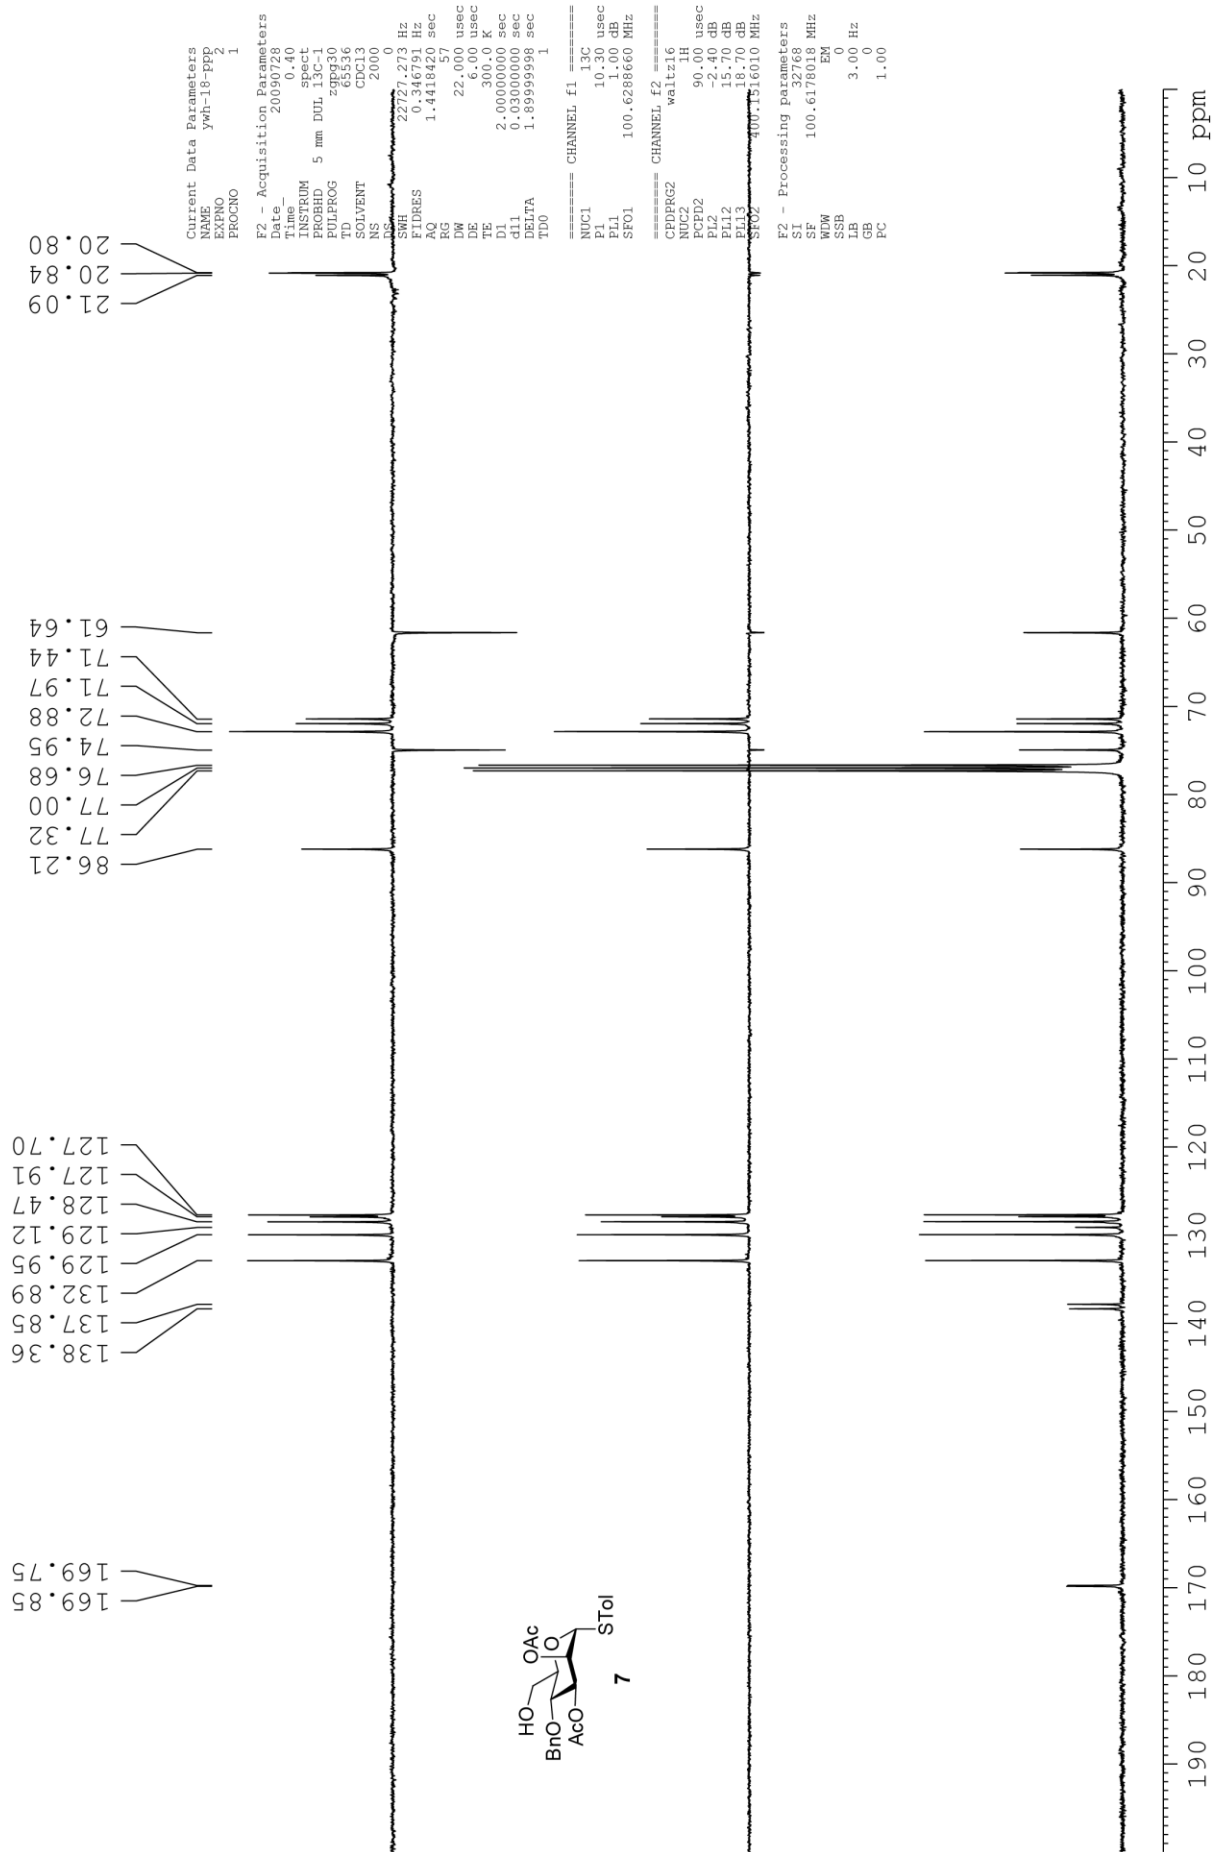





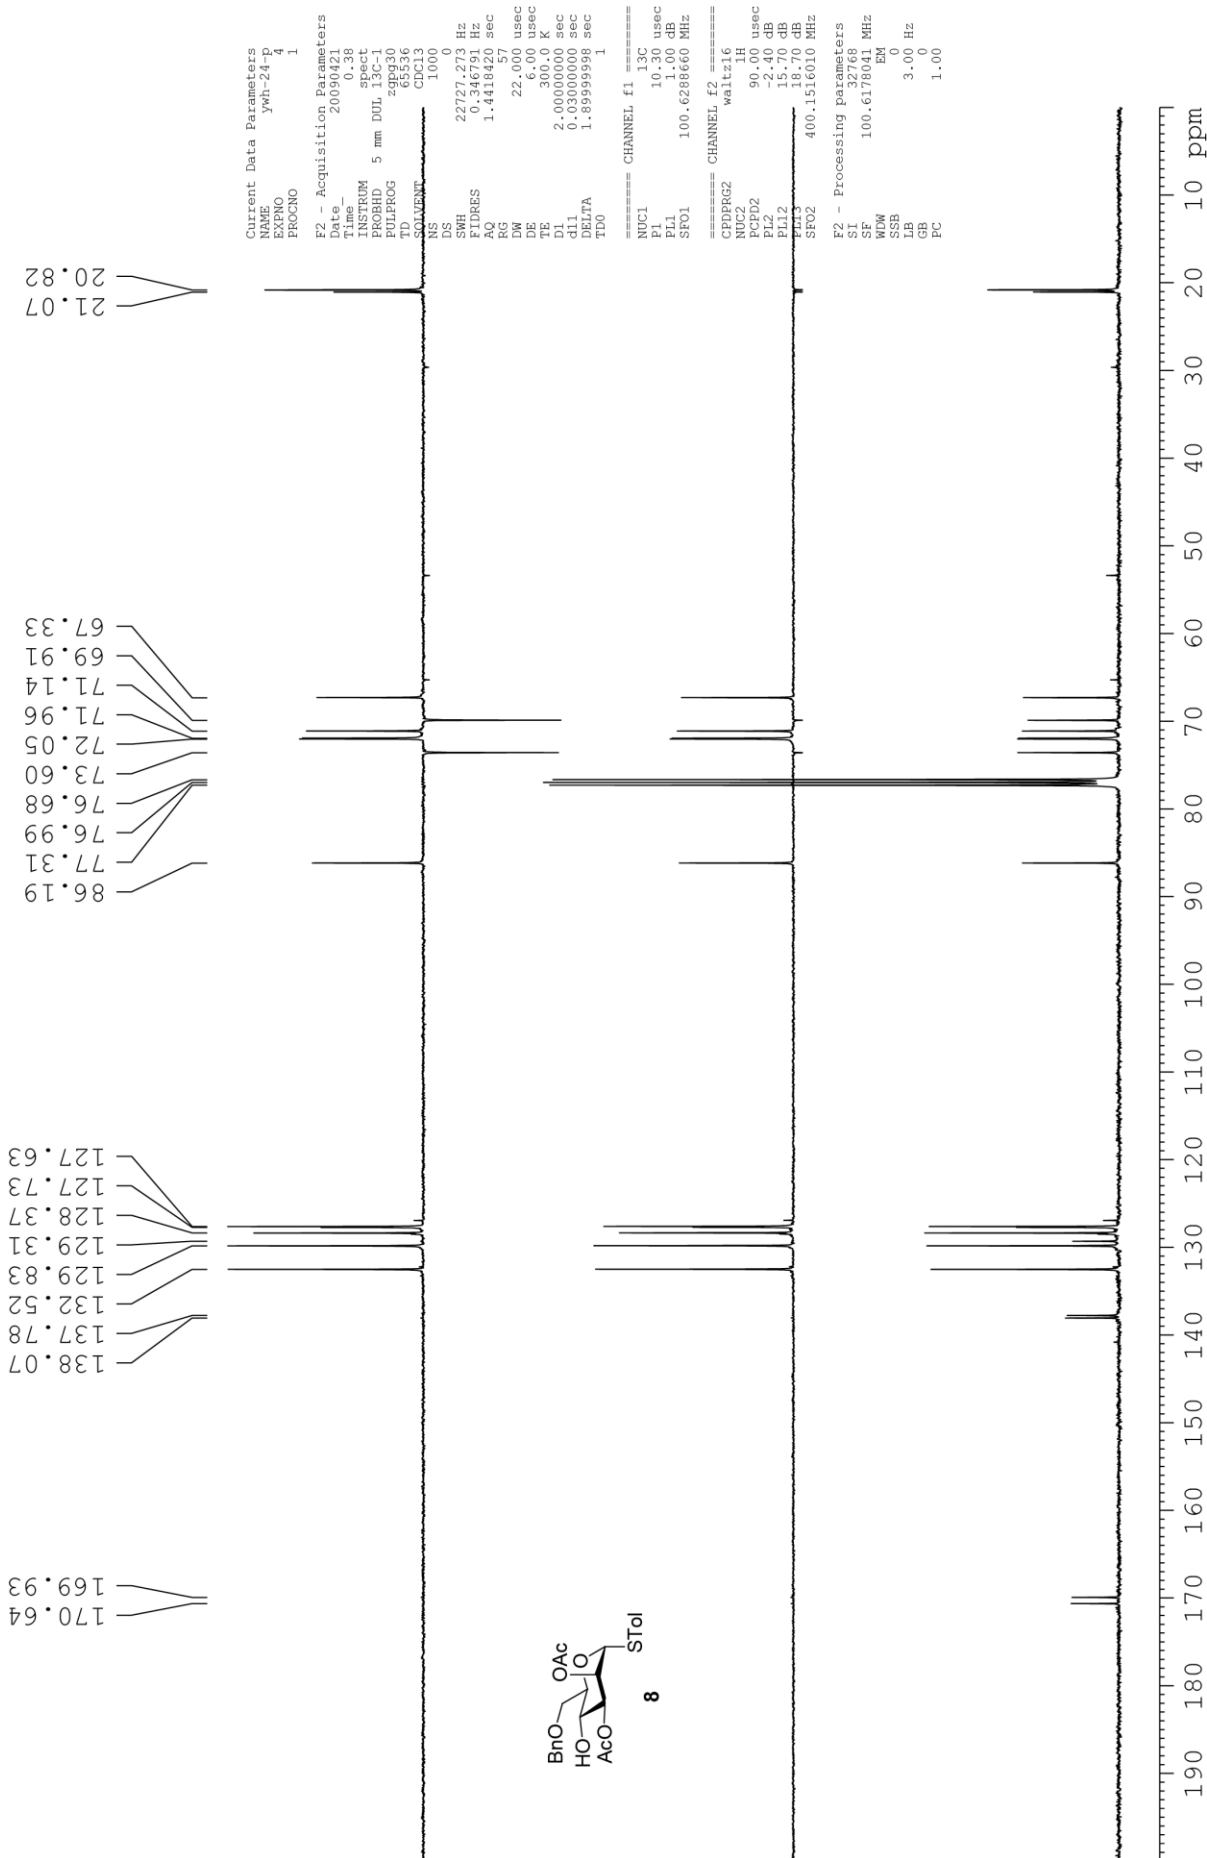

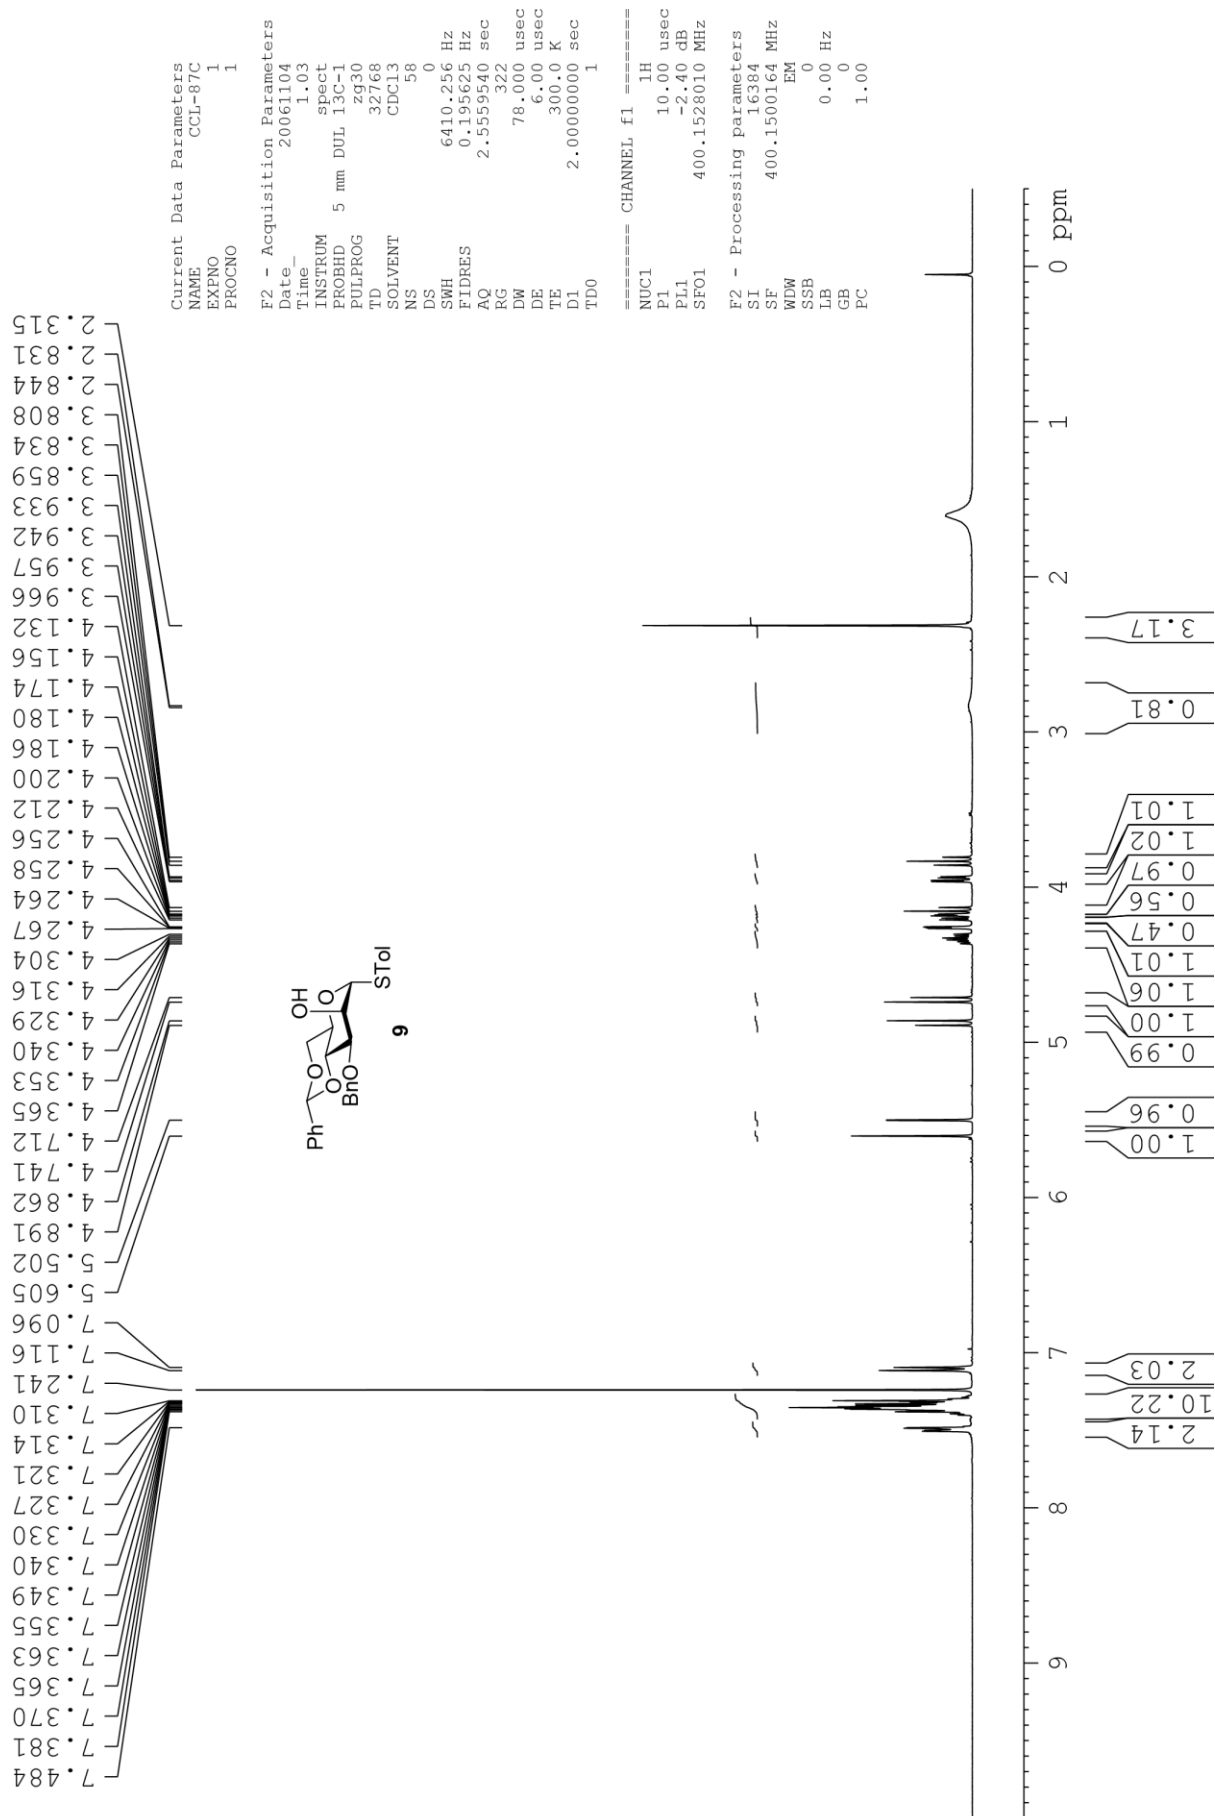

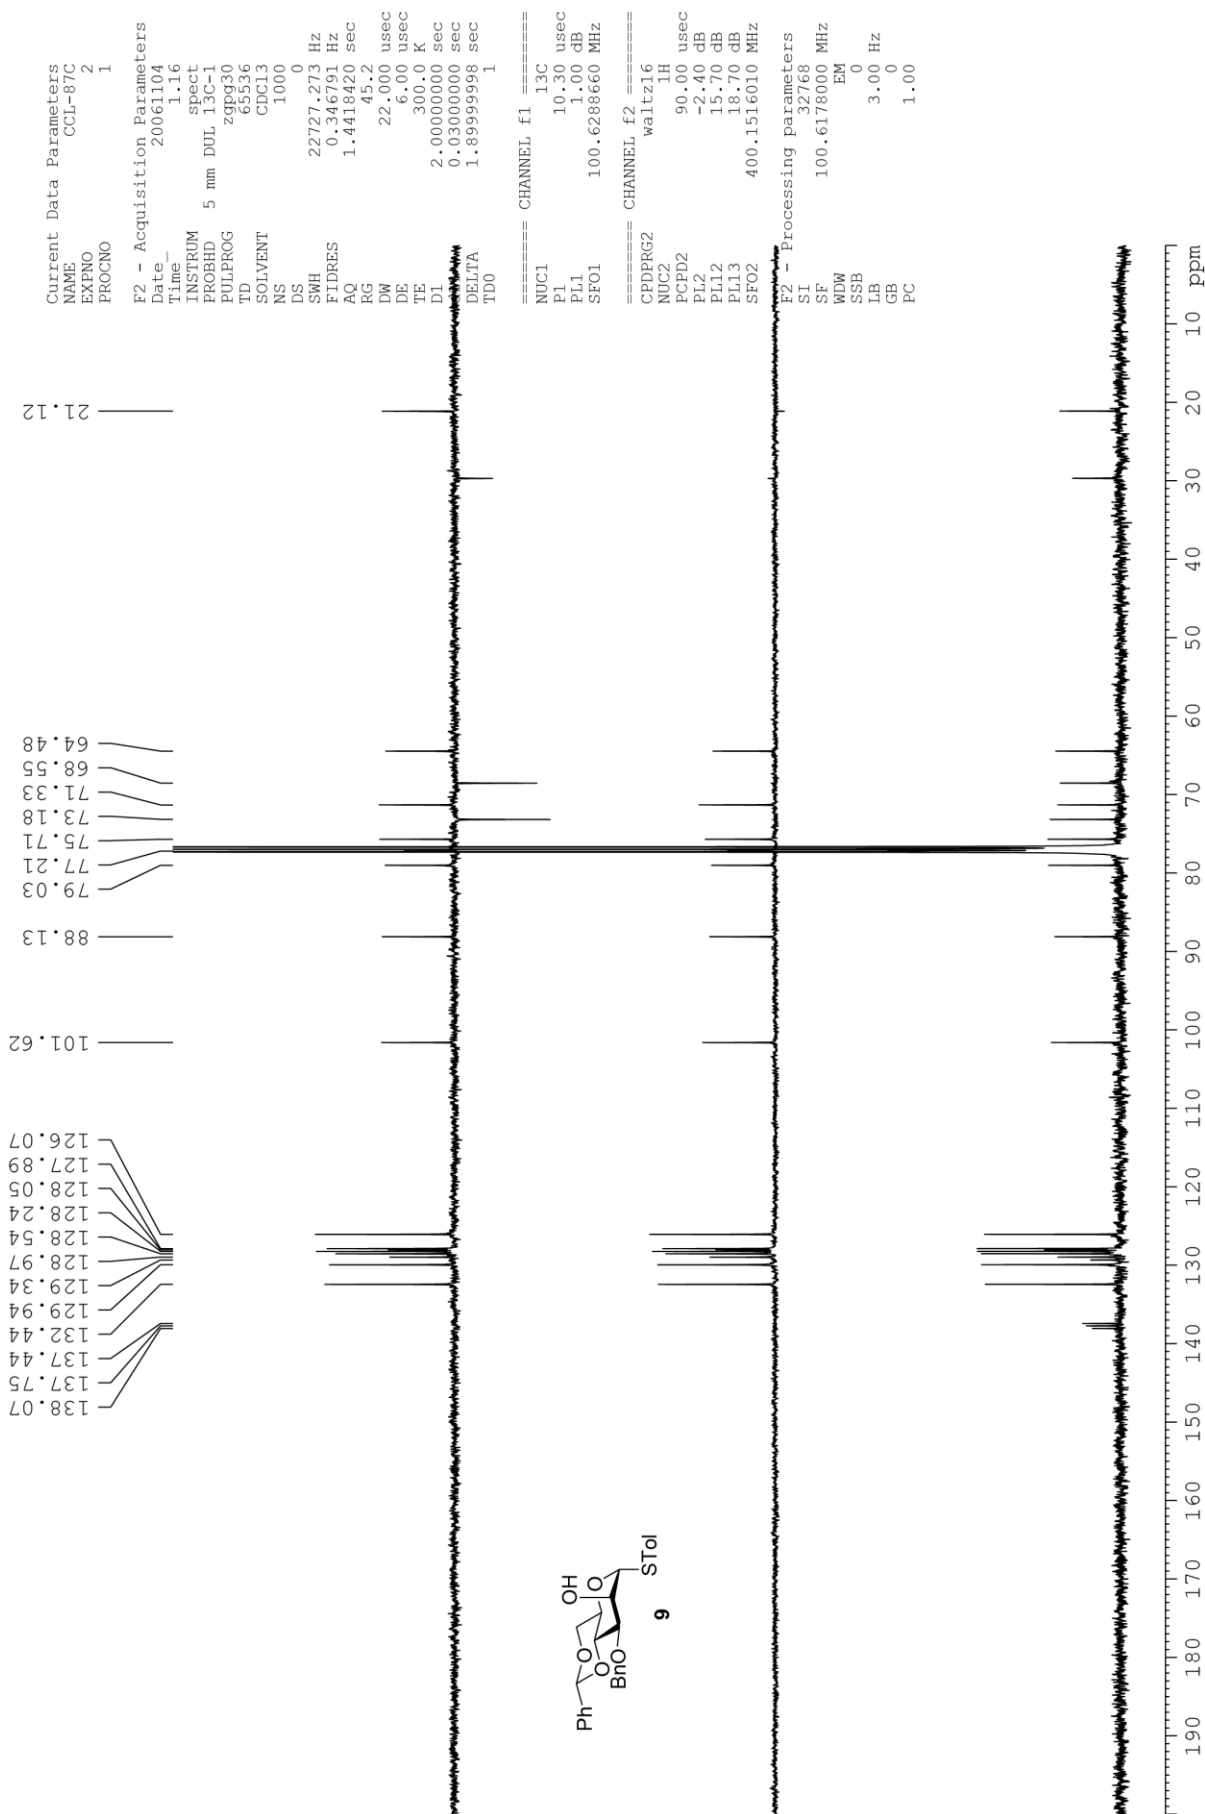

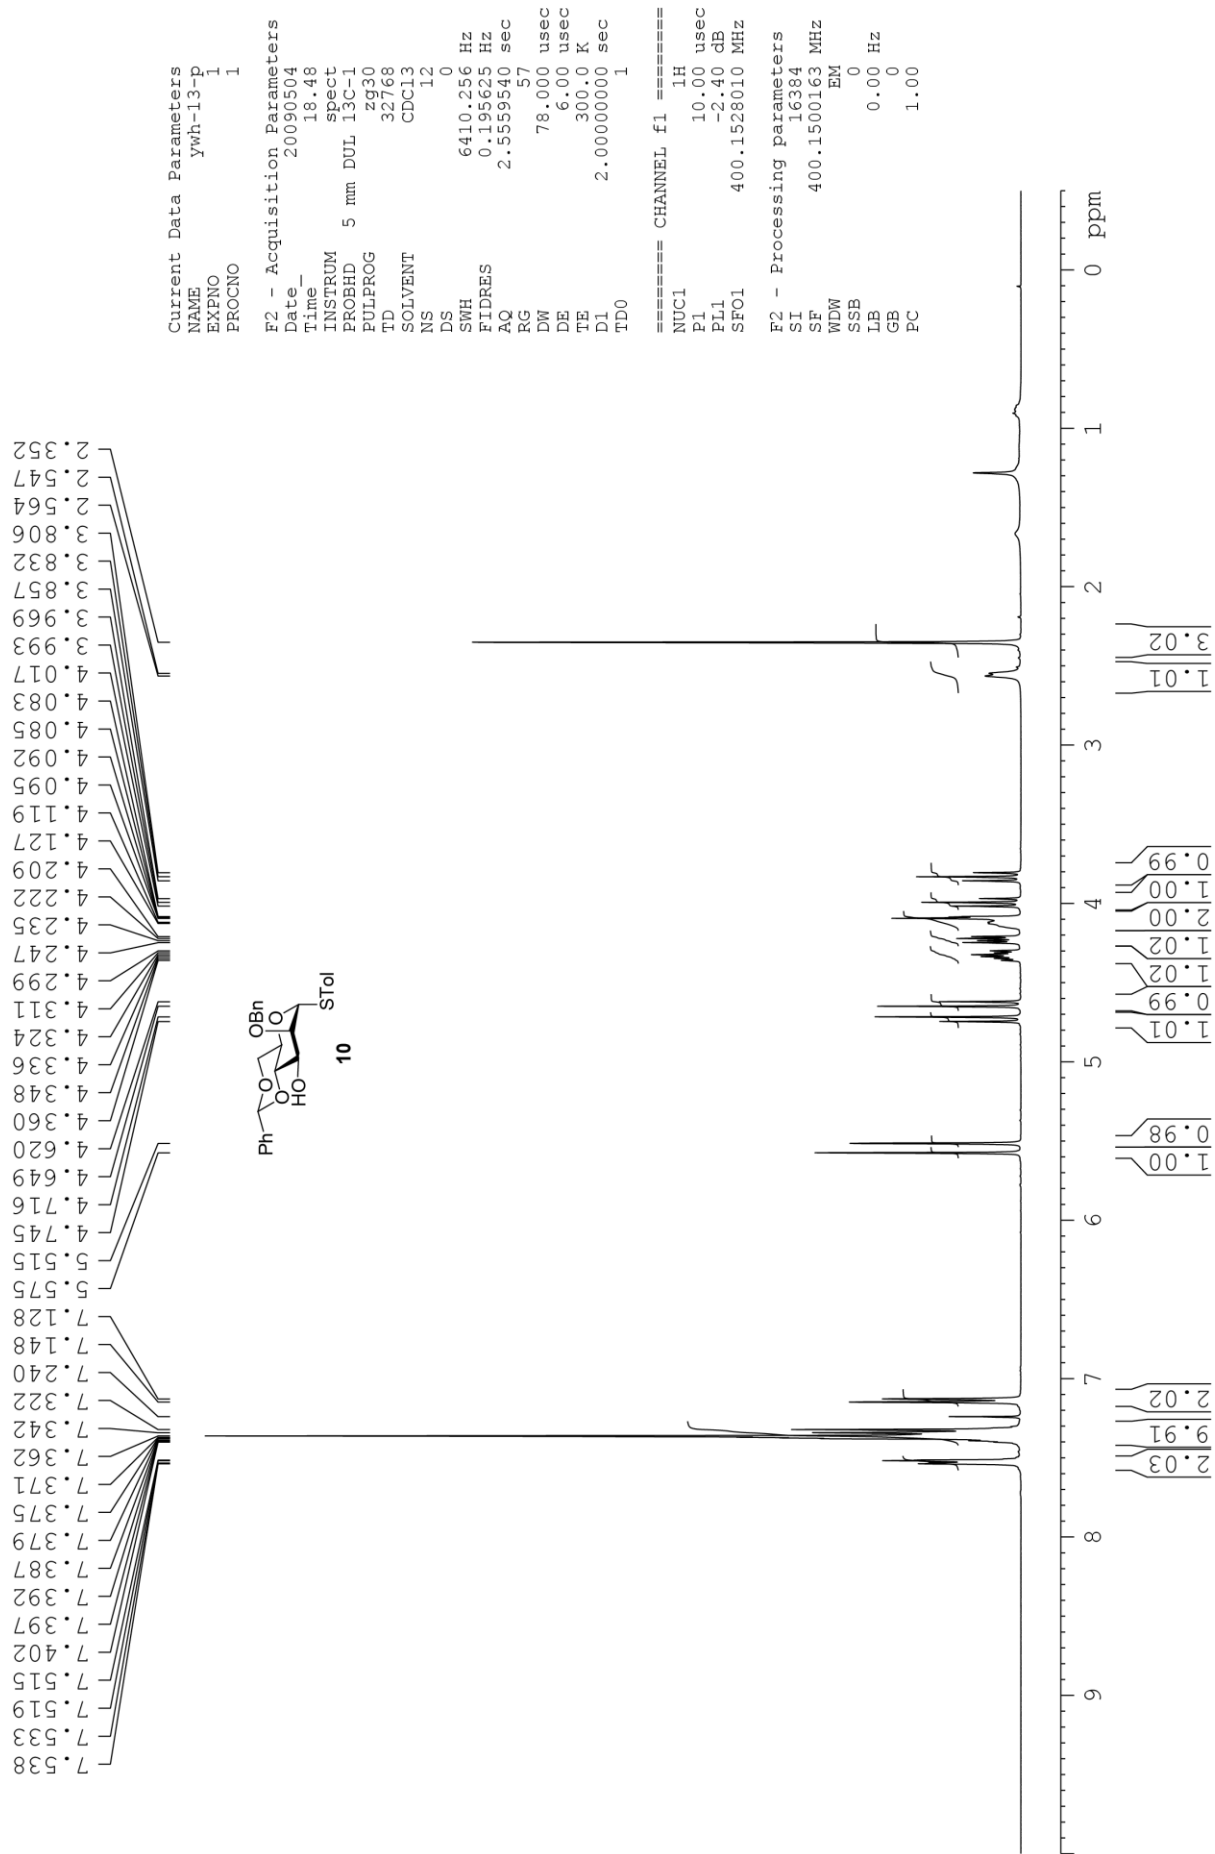

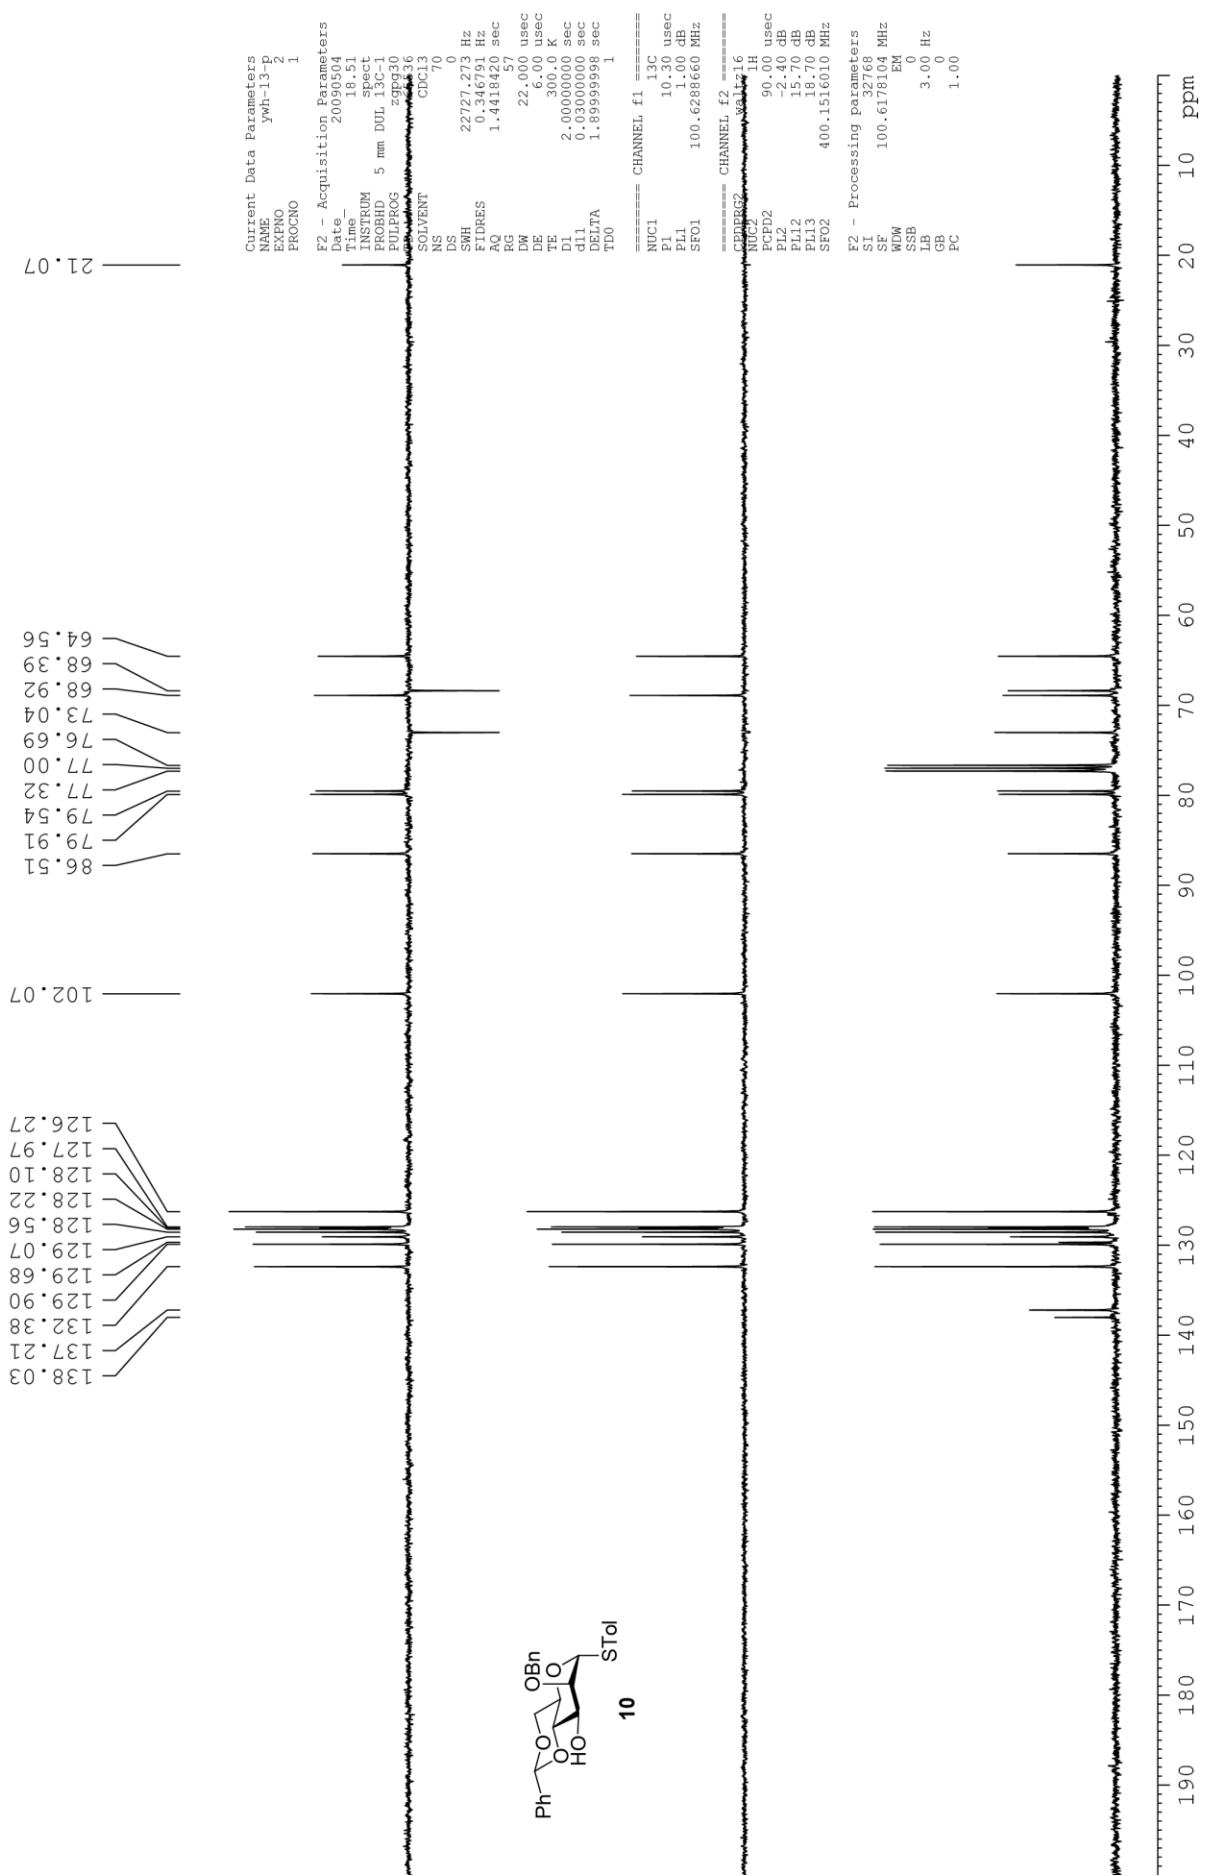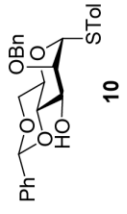

Supplement: c3ob40079d.pdf [file c3ob40079d.pdf]
